# Supplementary material for: Synthesis of non-proteinogenic phenylalanine derivatives by rhodium-catalyzed [2+2+2] cycloaddition reactions
Source: Royal Society of Chemistry journal article supplement (doi:10.1039/b910961g), 2009-01-01

## Electronic Supplementary Information

# Synthesis of non-proteinogenic phenylalanine derivatives by rhodium-catalyzed [2+2+2] cycloaddition reactions

Lidia Garcia, Anna Pla-Quintana\* and Anna Roglans\*

Department of Chemistry, University of Girona, Campus de Montilivi, s/n, 17071, Girona, Spain

Fax: (+34)972 41 81 50; e-mail: anna.roglans@udg.edu

### Contents

---

- Preparation of propargylglycine aminoacids L,D-**1a** and **1b** and characterization data S2-S3
- Preparation of diynes **2h**, **12a-b**, and **7b** and characterization data S3-S5
- Preparation of phenylalanine derivatives (*S*)-**4a** and (*S*)-**4b** by methylation reactions and characterization data S5
- Characterization data of homocoupled product **6** S6
- <sup>1</sup>H and <sup>13</sup>C NMR spectra of all new compounds S7-S35

## Preparation of propargylglycine amino acids **L,D-1a** and **1b** and characterization data

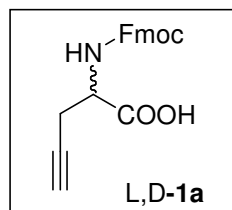

***N*-α-(((9*H*-Fluoren-9-yl)methoxy)carbonyl)-L,D-propargylglycine, L,D-**1a**.** In a two-necked 100 mL flask, L,D-propargylglycine (0.50 g, 4.42 mmols) and sodium bicarbonate (0.74 g, 8.84 mmols) were taken in a water:dioxane (1:3 (v:v)) mixture (16 mL) and cooled to 0°C with an ice-water bath. *N*-(9-Fluorenylmethoxycarbonyloxy)succinimide (1.51 g, 4.46 mmols) in dioxane (16 mL) was added dropwise to this solution and the resulting mixture was warmed to room temperature and stirred for 1h30m (TLC monitoring). The mixture was transferred to a decantation funnel and ethyl acetate (20 mL) and water (10 mL) were added. The resulting organic phase was washed with 1N hydrochloric acid (2 x 25 mL), water (2 x 25 mL), and brine (2 x 25 mL), then dried with anhydrous sodium sulfate, filtered, and the solvent was removed by vacuum evaporation to yield *N*-α-(((9*H*-fluoren-9-yl)methoxy)carbonyl)-L,D-propargylglycine, L,D-**1a** (1.46 g, 99% yield) as a colourless solid; mp 173-174°C; <sup>1</sup>H NMR (400 MHz, CD<sub>3</sub>COOD) δ 2.31 (t, *J* = 2.6 Hz, 1H), 2.81-2.87 (m, 2H), 4.28 (t, *J* = 6.8 Hz, 1H), 4.49 (d, *J* = 6.8 Hz, 2H), 4.65 (t, *J* = 5.4 Hz, 1H), 7.33 (t, *J* = 7.6 Hz, 2H), 7.41 (t, *J* = 7.6 Hz, 2H), 7.68 (d, *J* = 7.6 Hz, 2H), 7.80 (d, *J* = 7.6 Hz, 2H).

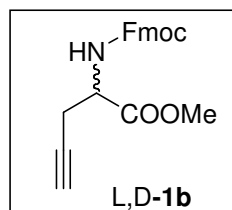

***N*-α-(((9*H*-Fluoren-9-yl)methoxy)carbonyl)-L,D-propargylglycine methyl ester, L,D-**1b**.** In a 10 mL flask, trimethylsilyl chloride (0.15 mL, 1.15 mmols) was added dropwise over *N*-α-(((9*H*-fluoren-9-yl)methoxy)carbonyl)-L,D-propargylglycine, L,D-**1a** (0.19 g, 0.56 mmols). Methanol was then added (2 mL) and the reaction was stirred at room temperature for 2 hours (TLC monitoring). The solvent was removed by vacuum evaporation to yield *N*-α-(((9*H*-Fluoren-9-yl)methoxy)carbonyl)-L,D-propargylglycine methyl ester, L,D-**1b** (0.18 g, 95% yield) as a colourless solid; mp 118-119 °C; <sup>1</sup>H NMR (400 MHz, CDCl<sub>3</sub>) δ 2.10 (t, *J* = 2.2 Hz, 1H), 2.82 (dd, *J* = 4.4 / 2.2 Hz, 2H), 3.84 (s, 3H), 4.28 (t, *J* = 7.2 Hz, 1H), 4.43 (d, *J* = 7.2 Hz, 1H), 4.59 (dt, *J* = 7.6 / 2.2 Hz, 1H), 5.68 (d, *J* = 7.6 Hz, 1H), 7.31-7.38 (m, 2H), 7.43 (t, *J* = 7.6 Hz, 2H), 7.62-7.66 (m, 2H), 7.79 (d, *J* = 7.6 Hz, 2H); <sup>13</sup>C NMR (100 MHz, CDCl<sub>3</sub>) δ 22.8, 47.1, 52.4, 52.9, 67.3, 71.9, 78.3, 120.0, 125.1, 127.1, 127.8, 141.3, 143.7, 143.8, 155.6, 170.8; ESI-MS (*m/z*) 350 [M+H]<sup>+</sup>, 372 [M+Na]<sup>+</sup>.

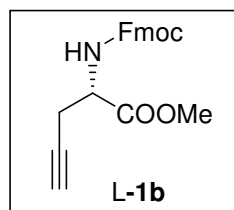

***N*-α-(((9*H*-Fluoren-9-yl)methoxy)carbonyl)-*L*-propargylglycine methyl ester, **L-1b**.**

**L-1b** was prepared according to the method described above for **L,D-1b**. Colourless solid (0.16 g, 96% yield, >99% ee)  $[\alpha]_D^{20} +25.84$  (*c* 0.02, CH<sub>2</sub>Cl<sub>2</sub>). The ee was determined with HPLC analysis using a chiral column (Kromasil 100 TBB column, 4.6

x 250 mm, 5 μm, r.t.; eluent: 99 % hexanes / 1 % THF, flow rate: 1.0 mL/min. over 40 min.; λ = 254 nm; retention time 24.8 min. and 27.0 min. for **L,D-1b**; retention time 24.8 min for **L-1b** (>99% ee)).

**Preparation of diynes **2h**, **12a-b**, and **7b** and characterization data**

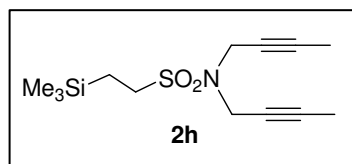

*N,N*-bis(2-butynyl)-(2-trimethylsilyl)etansulfonamide, **2h**. In a two-necked 100 mL flask, a mixture of 2-(trimethylsilyl)etansulfonamide (1.00 g, 5.51 mmols), potassium carbonate (3.83 g, 27.68 mmols) and 50 mL of acetonitrile

was heated to reflux. 1-Bromo-2-butyne (1.00 mL, 11.08 mmols) was added to this solution and the resulting mixture was stirred for 2h (TLC monitoring). The mixture was cooled to room temperature, salts were filtered off and the solvent was removed by vacuum evaporation to yield *N,N*-bis(2-butynyl)-(2-trimethylsilyl)etansulfonamide, **2h** (0.98 g, 62% yield) as a colourless solid; mp 49-50 °C; IR (ATR)  $\nu$  (cm<sup>-1</sup>): 2955, 1323, 1144; <sup>1</sup>H NMR (400 MHz, CDCl<sub>3</sub>) δ 0.05 (s, 9H), 1.00-1.07 (m, 2H), 1.82 (t, *J* = 2.4 Hz, 6H), 2.97-3.04 (m, 2H), 4.11 (q, *J* = 2.4 Hz, 4H); <sup>13</sup>C NMR (100 MHz, CDCl<sub>3</sub>) δ -2.0, 3.5, 9.8, 36.8, 48.6, 72.9, 81.3; ESI-MS (*m/z*) 308 [M+Na]<sup>+</sup>; HRMS calcd. for [C<sub>13</sub>H<sub>23</sub>NO<sub>2</sub>SSi + H]<sup>+</sup>: 308.1111. Found: 308.1123.

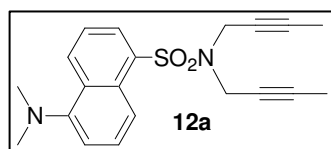

*N,N*-bis(2-butynyl)-5-(dimethylamino)naphthalene-1-sulfonamide, **12a**. **12a** was prepared according to the method described above for **2h**. Yellow solid (0.42 g, 100% yield); mp 94-95 °C; IR (ATR)  $\nu$  (cm<sup>-1</sup>): 2919, 1340, 1144; <sup>1</sup>H NMR (300

MHz, CDCl<sub>3</sub>) δ 1.63 (t, *J* = 2.4 Hz, 6H), 2.87 (s, 6H), 4.17 (q, *J* = 2.4 Hz, 4H), 7.17 (d, *J* = 7.5 Hz, 1H), 7.46-7.58 (m, 2H), 7.24 (d, *J* = 7.5 Hz, 1H), 7.32 (d, *J* = 8.6 Hz, 1H), 8.54 (d, *J* = 8.6 Hz, 1H); <sup>13</sup>C NMR (75 MHz, CDCl<sub>3</sub>) δ 3.4, 36.3, 45.4, 72.2, 81.3, 115.2, 119.8, 123.1, 128.0, 130.0, 130.3, 130.5, 134.6, 151.6; ESI-MS (*m/z*) 355 [M+H]<sup>+</sup>; HRMS calcd. for [C<sub>20</sub>H<sub>22</sub>N<sub>2</sub>O<sub>2</sub>S + H]<sup>+</sup>: 355.1475. Found: 355.1481.

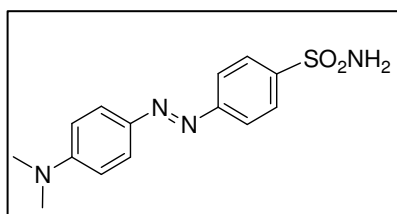

**4-Dimethylaminoazobenzene-4'-sulfonamide.** A degassed solution of 4-dimethylaminoazobenzene-4'-sulfonyl chloride (0.99 g, 2.98 mmols), 28 mL of ammonium hydroxide (25%) and 60 mL of dichloromethane was stirred at room temperature for 2h (TLC monitoring). The solid obtained was then filtered and washed with ethyl ether (2 x 20 mL) to afford 4-dimethylaminoazobenzene-4'-sulfonamide (0.91 g, 99% yield) as an orange solid; mp 228-229 °C; IR (ATR)  $\nu$  (cm<sup>-1</sup>): 3343, 3247, 1604, 1301, 1140; <sup>1</sup>H NMR (400 MHz, acetone-d<sub>6</sub>)  $\delta$  3.14 (s, 6H), 3.50-3.54 (m, 1H), 3.59-3.63 (m, 1H), 6.87 (d,  $J$  = 9.2 Hz, 2H), 7.87 (d,  $J$  = 9.2 Hz, 2H), 7.92 (d,  $J$  = 9.2 Hz, 2H), 8.02 (d,  $J$  = 9.2 Hz, 2H); <sup>13</sup>C NMR (100 MHz, acetone-d<sub>6</sub>)  $\delta$  40.4, 62.0, 73.5, 112.5, 123.1, 126.4, 128.1, 144.3, 145.1, 154.4, 155.9; ESI-MS ( $m/z$ ) 276 [M+H]<sup>+</sup>, 298 [M+Na]<sup>+</sup>.

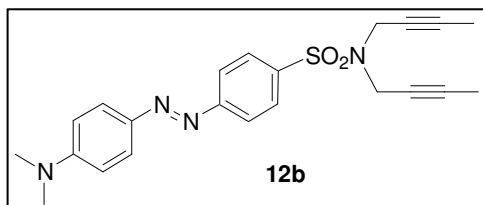

***N,N*-bis(2-butynyl)-4-dimethylaminoazobenzene-4'-sulfonamide,**

**12b.** **12b** was prepared according to the method described above for **2h**. Red solid (0.41 g, 99% yield); mp 165-166 °C; IR (ATR)  $\nu$  (cm<sup>-1</sup>):

2919, 1602, 1344, 1134; <sup>1</sup>H NMR (300 MHz, CDCl<sub>3</sub>)  $\delta$  1.64 (t,  $J$  = 2.4 Hz, 6H), 3.11 (s, 6H), 4.12 (q,  $J$  = 2.4 Hz, 4H), 6.75 (d,  $J$  = 9.3 Hz, 2H), 7.86-7.92 (m, 6H); <sup>13</sup>C NMR (75 MHz, CDCl<sub>3</sub>)  $\delta$  3.4, 36.7, 40.2, 71.5, 81.9, 111.4, 122.1, 125.7, 128.9, 137.9, 143.6, 153.1, 155.7; ESI-MS ( $m/z$ ) 409 [M+H]<sup>+</sup>; HRMS calcd. for [C<sub>22</sub>H<sub>24</sub>N<sub>4</sub>O<sub>2</sub>S + H]<sup>+</sup>: 409.1693. Found: 409.1679.

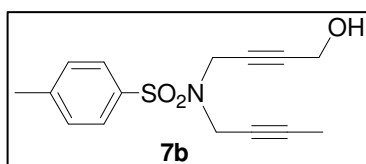

***N*-(2-butynyl)-*N*-(2-propynyl-4-ol)-(4-methylphenyl)sulfonamide, 7b.** In a two-necked 25 mL flask, 1.7 mL (2.72 mmols) of 1.6 M solution *n*-BuLi in hexanes was added dropwise to a solution of *N*-(2-butynyl)-*N*-(2-propynyl)-(4-

methylphenyl)sulfonamide (1.00 g, 5.51 mmols) in 2 mL of anhydrous THF at -78 °C under a nitrogen atmosphere. The mixture was stirred for 1h and then a solution of *p*-formaldehyde (0.42 g, 12.68 mmols) in 1 mL of anhydrous THF at -78 °C was added and allowed to warm to room temperature overnight. The reaction was quenched with saturated ammonium chloride (10 mL) and the aqueous layer was extracted with ethyl acetate (3 x 10 mL), dried over sodium sulfate, filtered and concentrated. The product was purified by column chromatography on silica gel using mixtures of hexanes/ethyl acetate of increasing polarity (8/2 to 7/3) as the

eluent to afford **7b** (0.24 g, 39% yield) as a yellow oil; IR (ATR)  $\nu$  (cm<sup>-1</sup>): 3525, 2920, 1345, 1157; <sup>1</sup>H NMR (400 MHz, CDCl<sub>3</sub>)  $\delta$  1.65 (t,  $J$  = 2.4 Hz, 3H), 1.97 (br abs, 1H), 2.42 (s, 3H), 4.06-4.10 (m, 4H), 4.14-4.18 (m, 2H), 7.30 (AA' part, AA'BB' syst.,  $J$  = 8.4 Hz, 2H), 7.72 (BB' part, AA'BB' syst.,  $J$  = 8.4 Hz, 2H); <sup>13</sup>C NMR (100 MHz, CDCl<sub>3</sub>)  $\delta$  3.3, 21.4, 36.3, 36.8, 50.6, 71.2, 78.2, 82.0, 83.7, 127.9, 129.3, 135.1, 143.7; HRMS calcd. for [C<sub>15</sub>H<sub>17</sub>NO<sub>3</sub>S + H]<sup>+</sup>: 292.1002. Found: 292.1016.

### Preparation of phenylalanine derivatives (*S*)-**4a** and (*S*)-**4b** by methylation reactions and characterization data

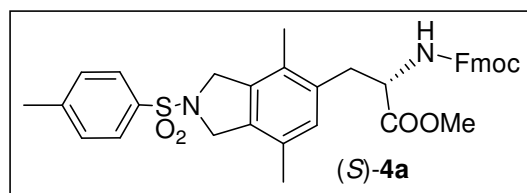

**(S)-2-(((9H-Fluoren-9-yl)methoxy)carbonylamino)-3-(4,7-dimethyl-2-tosylisoindolin-5-yl)propanoic acid methyl ester, (*S*)-**4a**.** In a 25 mL flask, trimethylsilyl chloride (0.01

mL, 0.06 mmols) was added dropwise over (*S*)-**3a** (0.020 g, 0.03 mmols). Methanol was then added (1 mL) and the reaction mixture was stirred at room temperature for 1 hour (TLC monitoring). The solvent was removed by vacuum evaporation, the residue was taken in dichloromethane, filtered, and the solvent removed to yield (*S*)-**4a** (0.020 g, 96% yield, >99% ee) as a colourless solid [ $\alpha$ ]<sub>D</sub><sup>20</sup> +19.05 ( $c$  0.01, CH<sub>2</sub>Cl<sub>2</sub>). The ee was determined with HPLC analysis using a chiral column (Kromasil 100 TBB column, 4.6 x 250 mm, 5  $\mu$ m, r.t.; eluent: 90 % hexanes / 10 % THF, flow rate: 1.0 mL/min. over 40 min.;  $\lambda$  = 254 nm; retention time 23.8 min. and 27.5 min. for (*R,S*)-**4a**; retention time 27.5 min for (*S*)-**4a** (>99% ee)).

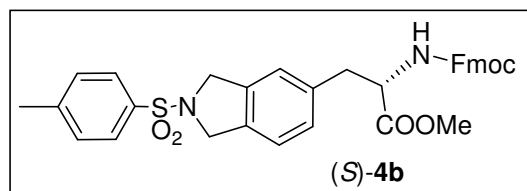

**(S)-2-(((9H-Fluoren-9-yl)methoxy)carbonylamino)-3-(2-tosylisoindolin-5-yl)propanoic acid methyl ester, (*S*)-**4b**** was prepared according to the methylation method described above.

Colourless solid (95% yield, >99% ee) [ $\alpha$ ]<sub>D</sub><sup>20</sup> +16.0 ( $c$  0.01, CH<sub>2</sub>Cl<sub>2</sub>). The ee was determined with HPLC analysis using a chiral column (Kromasil 100 TBB column, 4.6 x 250 mm, 5  $\mu$ m, r.t.; eluent: 90 % hexanes / 10 % THF, flow rate: 1.0 mL/min. over 40 min.;  $\lambda$  = 254 nm; retention time 36.2 min. and 41.4 min. for (*R,S*)-**4b**; retention time 41.4 min for (*S*)-**4b** (>99% ee)).

### Characterization data of homocoupled product **6**

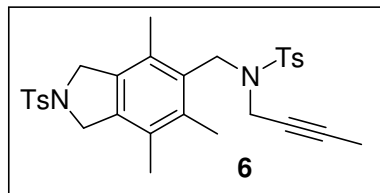

Colourless solid; mp 188-189 °C; IR (ATR)  $\nu$  ( $\text{cm}^{-1}$ ): 2918, 1342, 1158;

$^1\text{H}$  NMR (400 MHz,  $\text{CDCl}_3$ )  $\delta$  1.41 (t,  $J = 2.4$  Hz, 3H), 2.07 (s, 3H), 2.20 (s, 3H), 2.27 (s, 3H), 2.40 (s, 3H), 2.44 (s, 3H), 3.61 (q,  $J = 2.4$  Hz, 2H), 4.42 (s, 2H), 4.55 (br abs, 2H), 4.58 (br abs, 2H), 7.32 (d,  $J = 7.6$  Hz, 4H), 7.75-

7.82 (m, 4H);  $^{13}\text{C}$  NMR (100 MHz,  $\text{CDCl}_3$ )  $\delta$  3.4, 15.9, 16.4, 16.7, 21.7, 35.3, 44.9, 54.2, 54.3, 72.8, 82.3, 127.8,

128.6, 129.3, 129.4, 130.1, 130.5, 131.0, 133.2, 134.2, 135.3, 135.8, 137.8, 143.6, 143.9; ESI-MS ( $m/z$ ) 551

$[\text{M}+\text{H}]^+$ .

# <sup>1</sup>H and <sup>13</sup>C NMR spectra of diynes 2h, 12a-b, and 7b

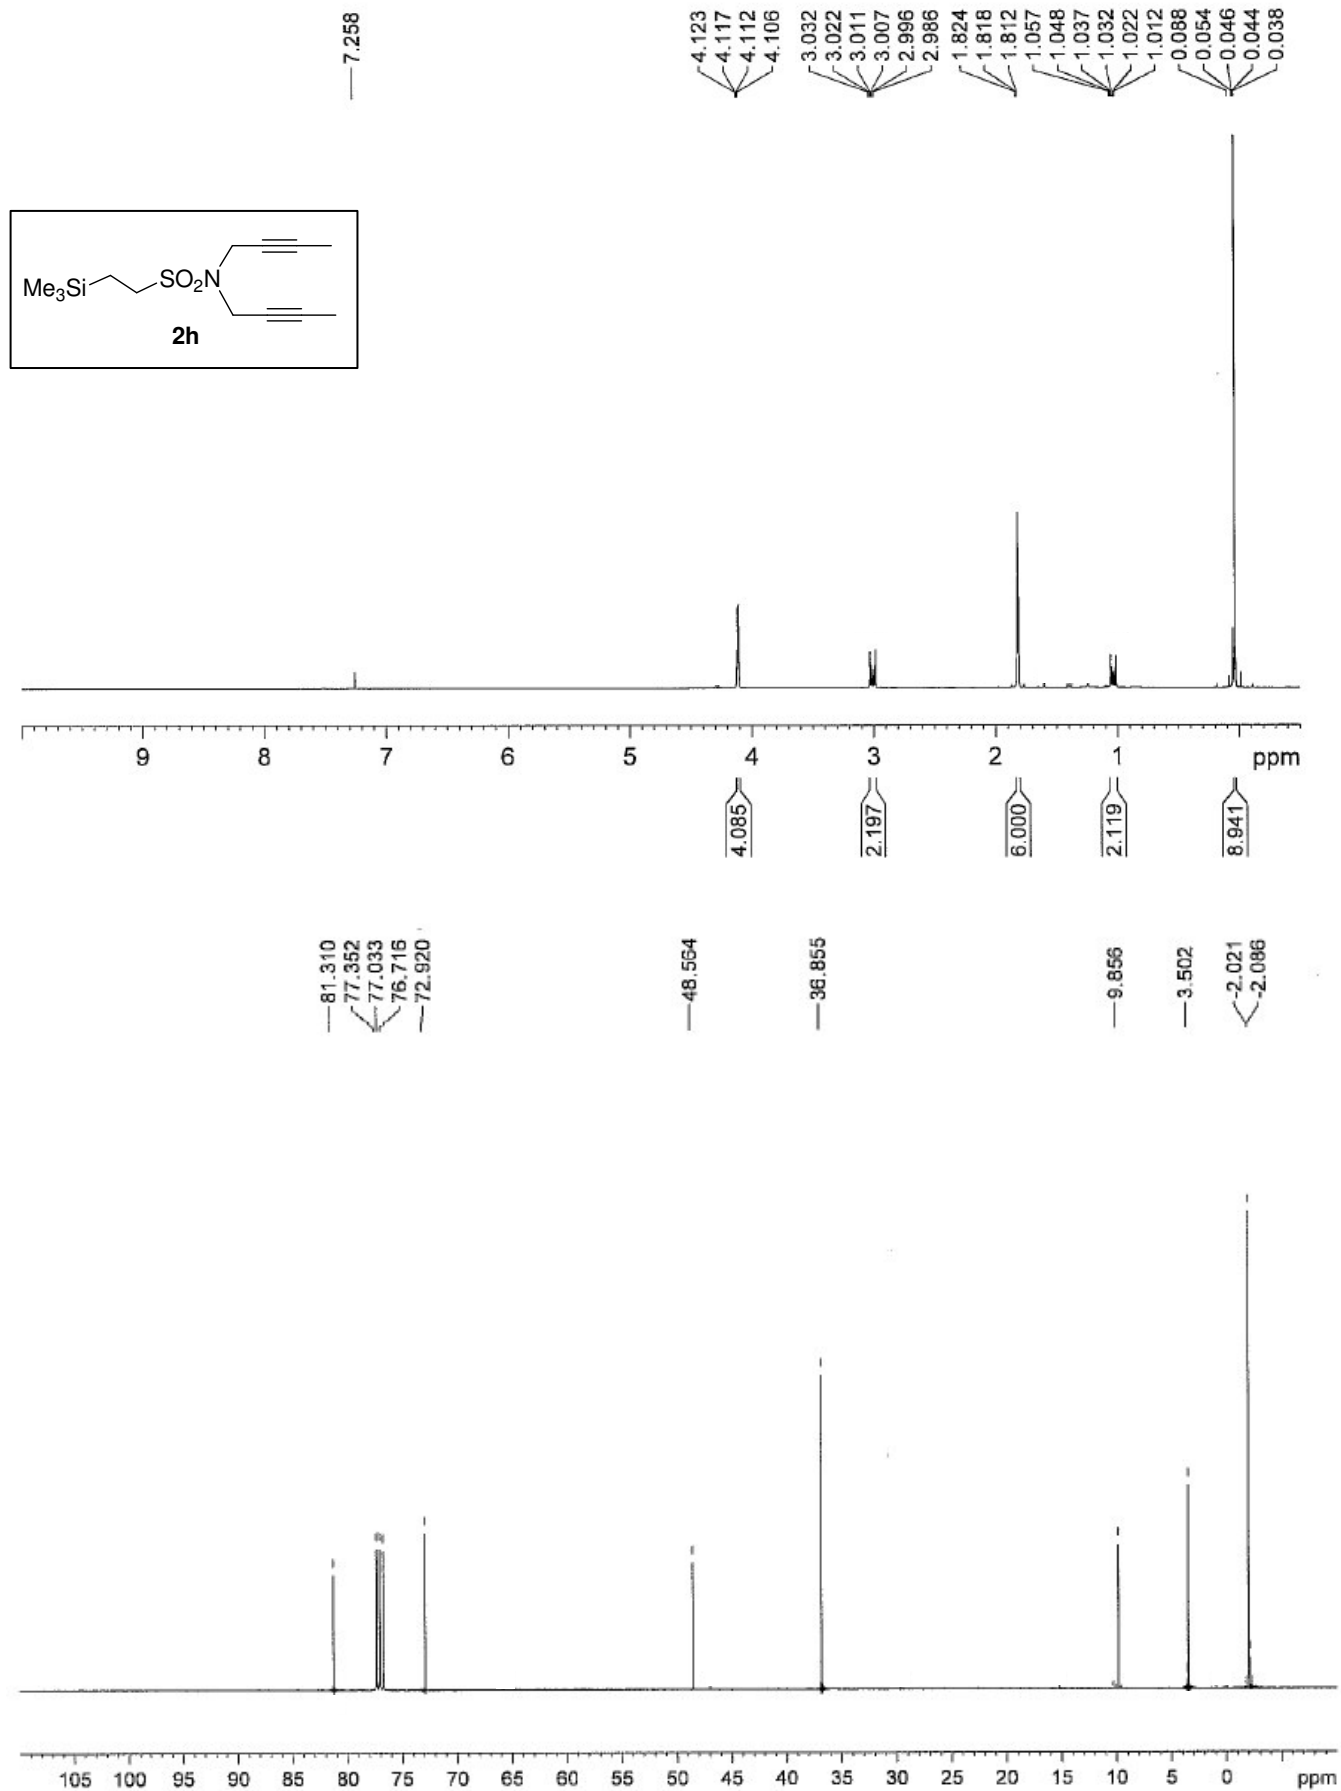

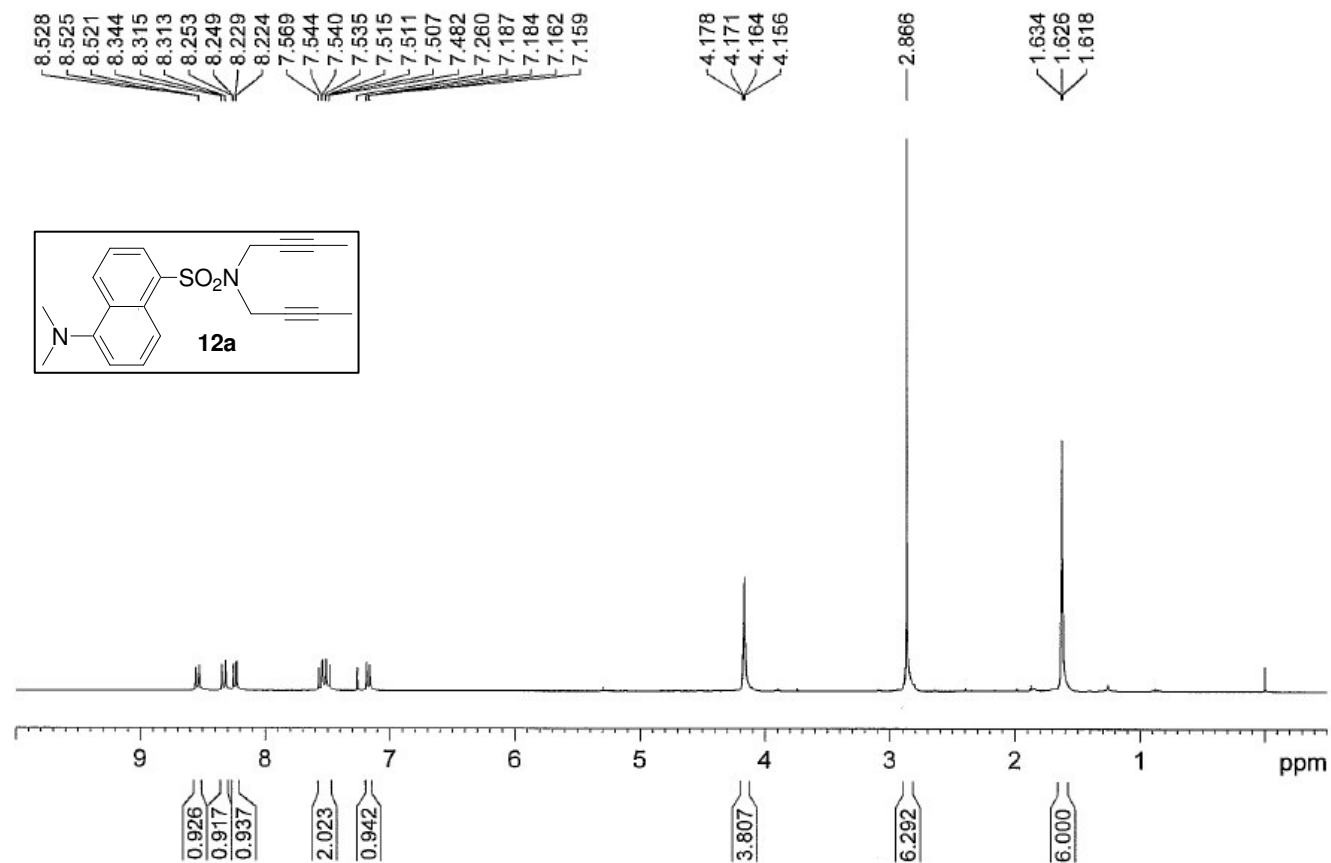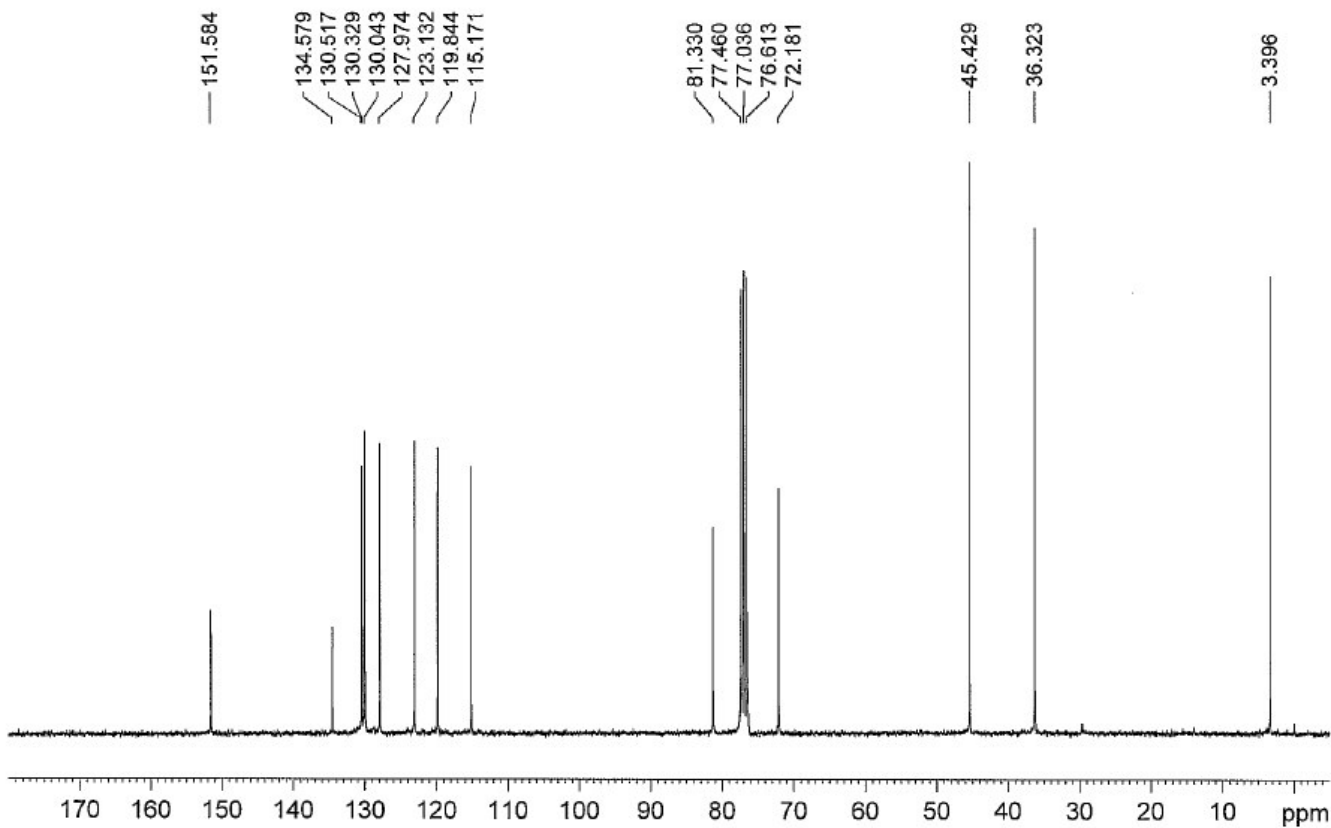



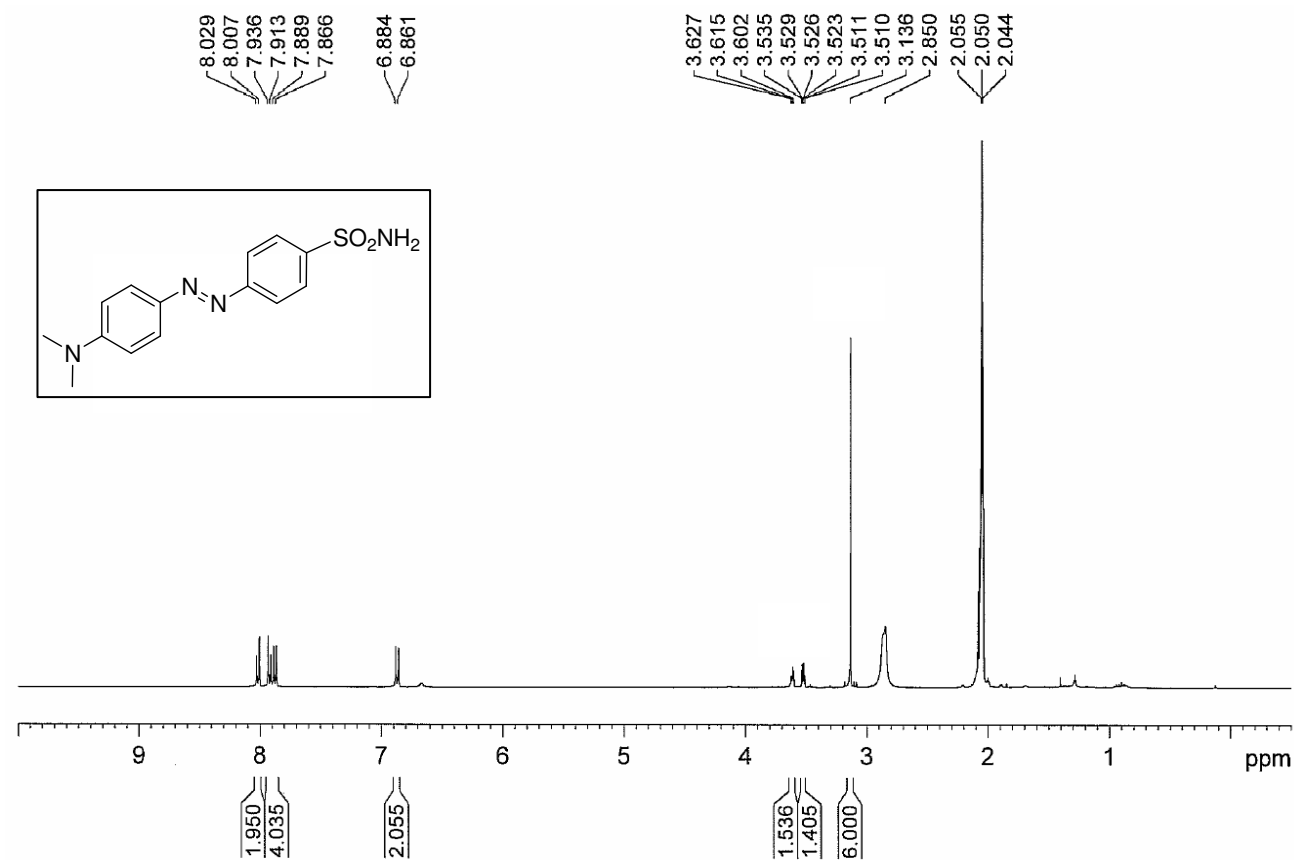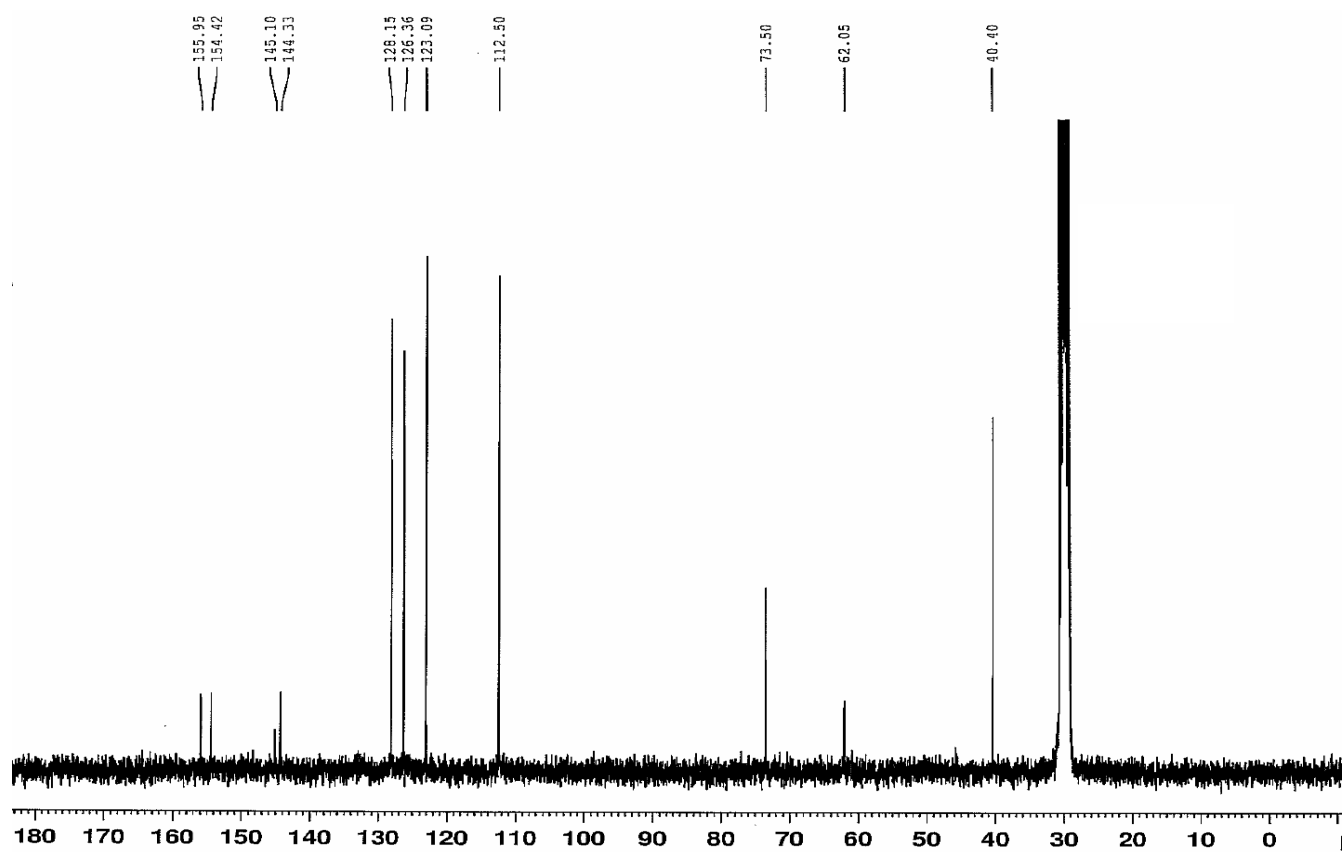

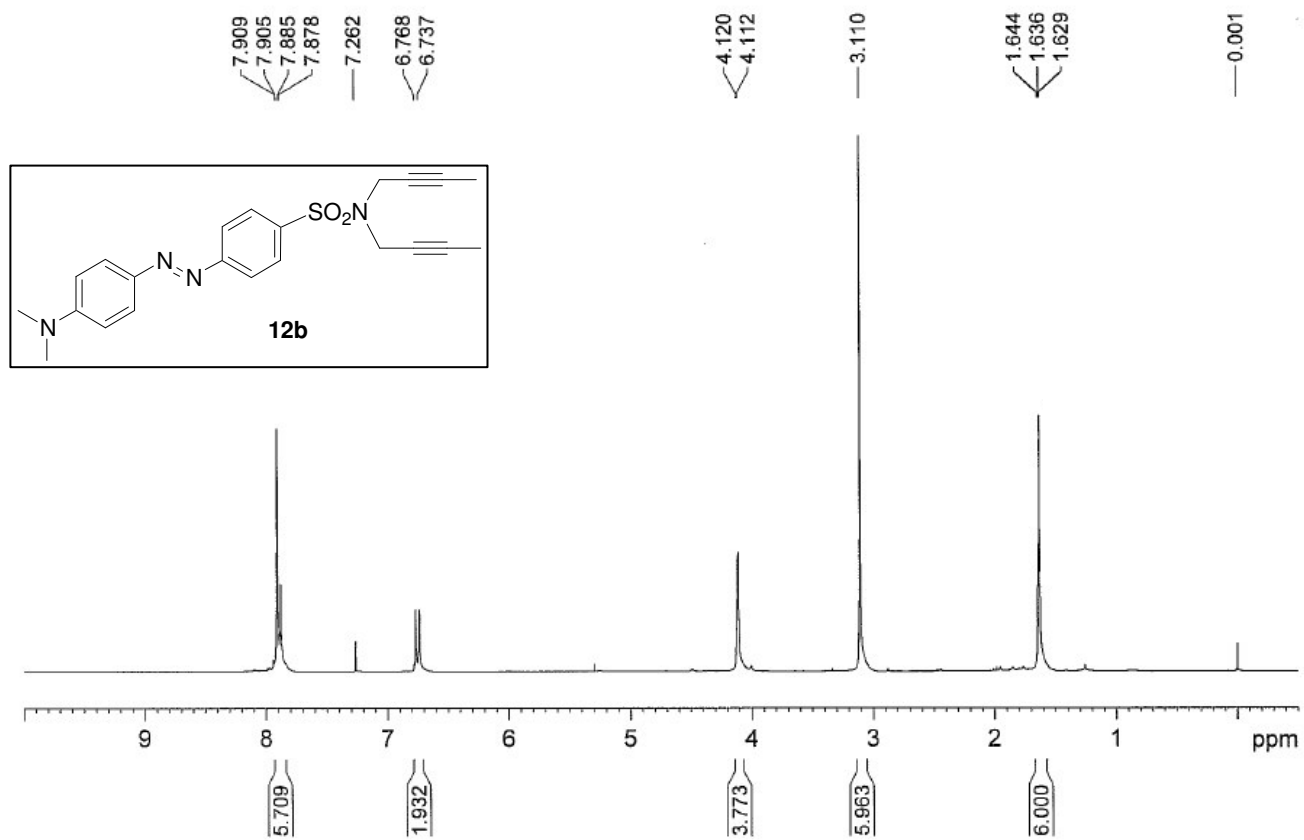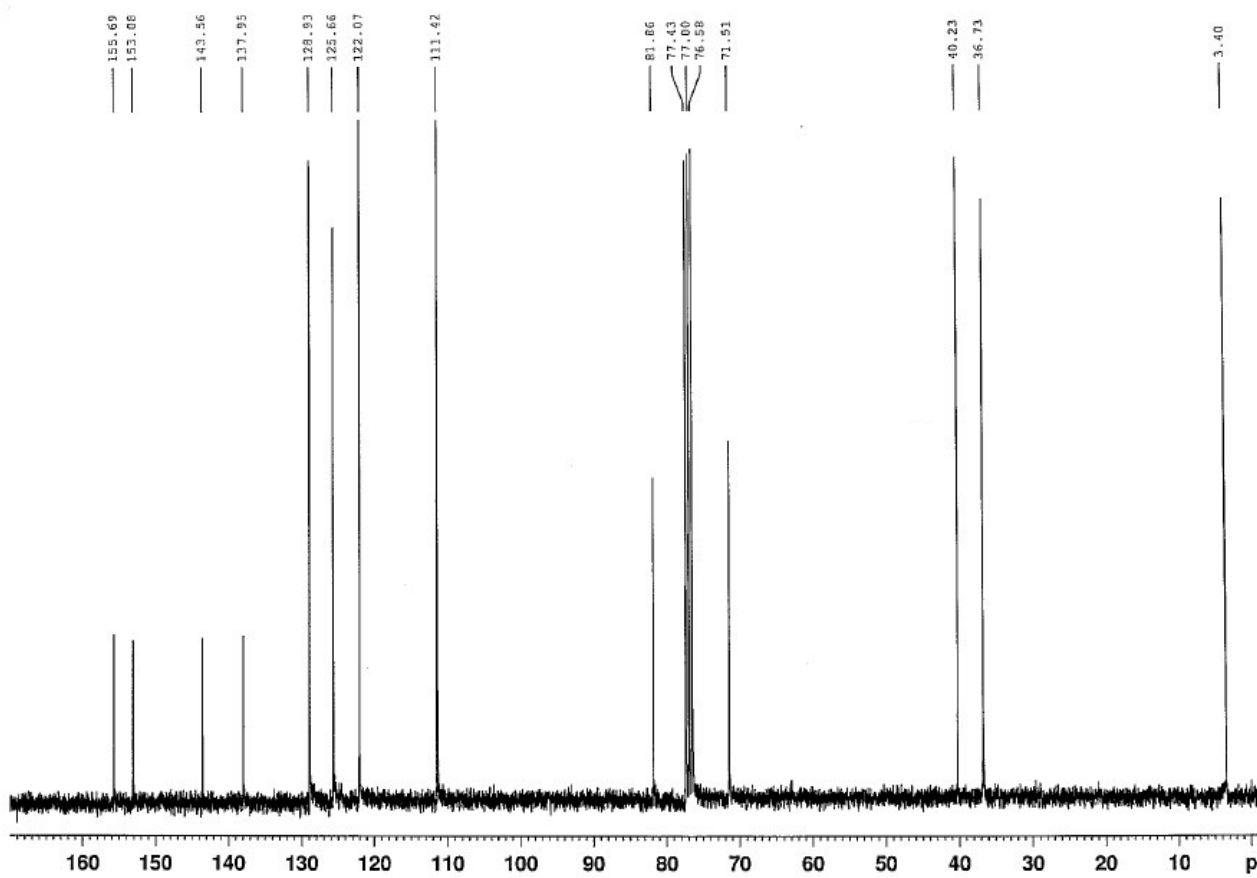

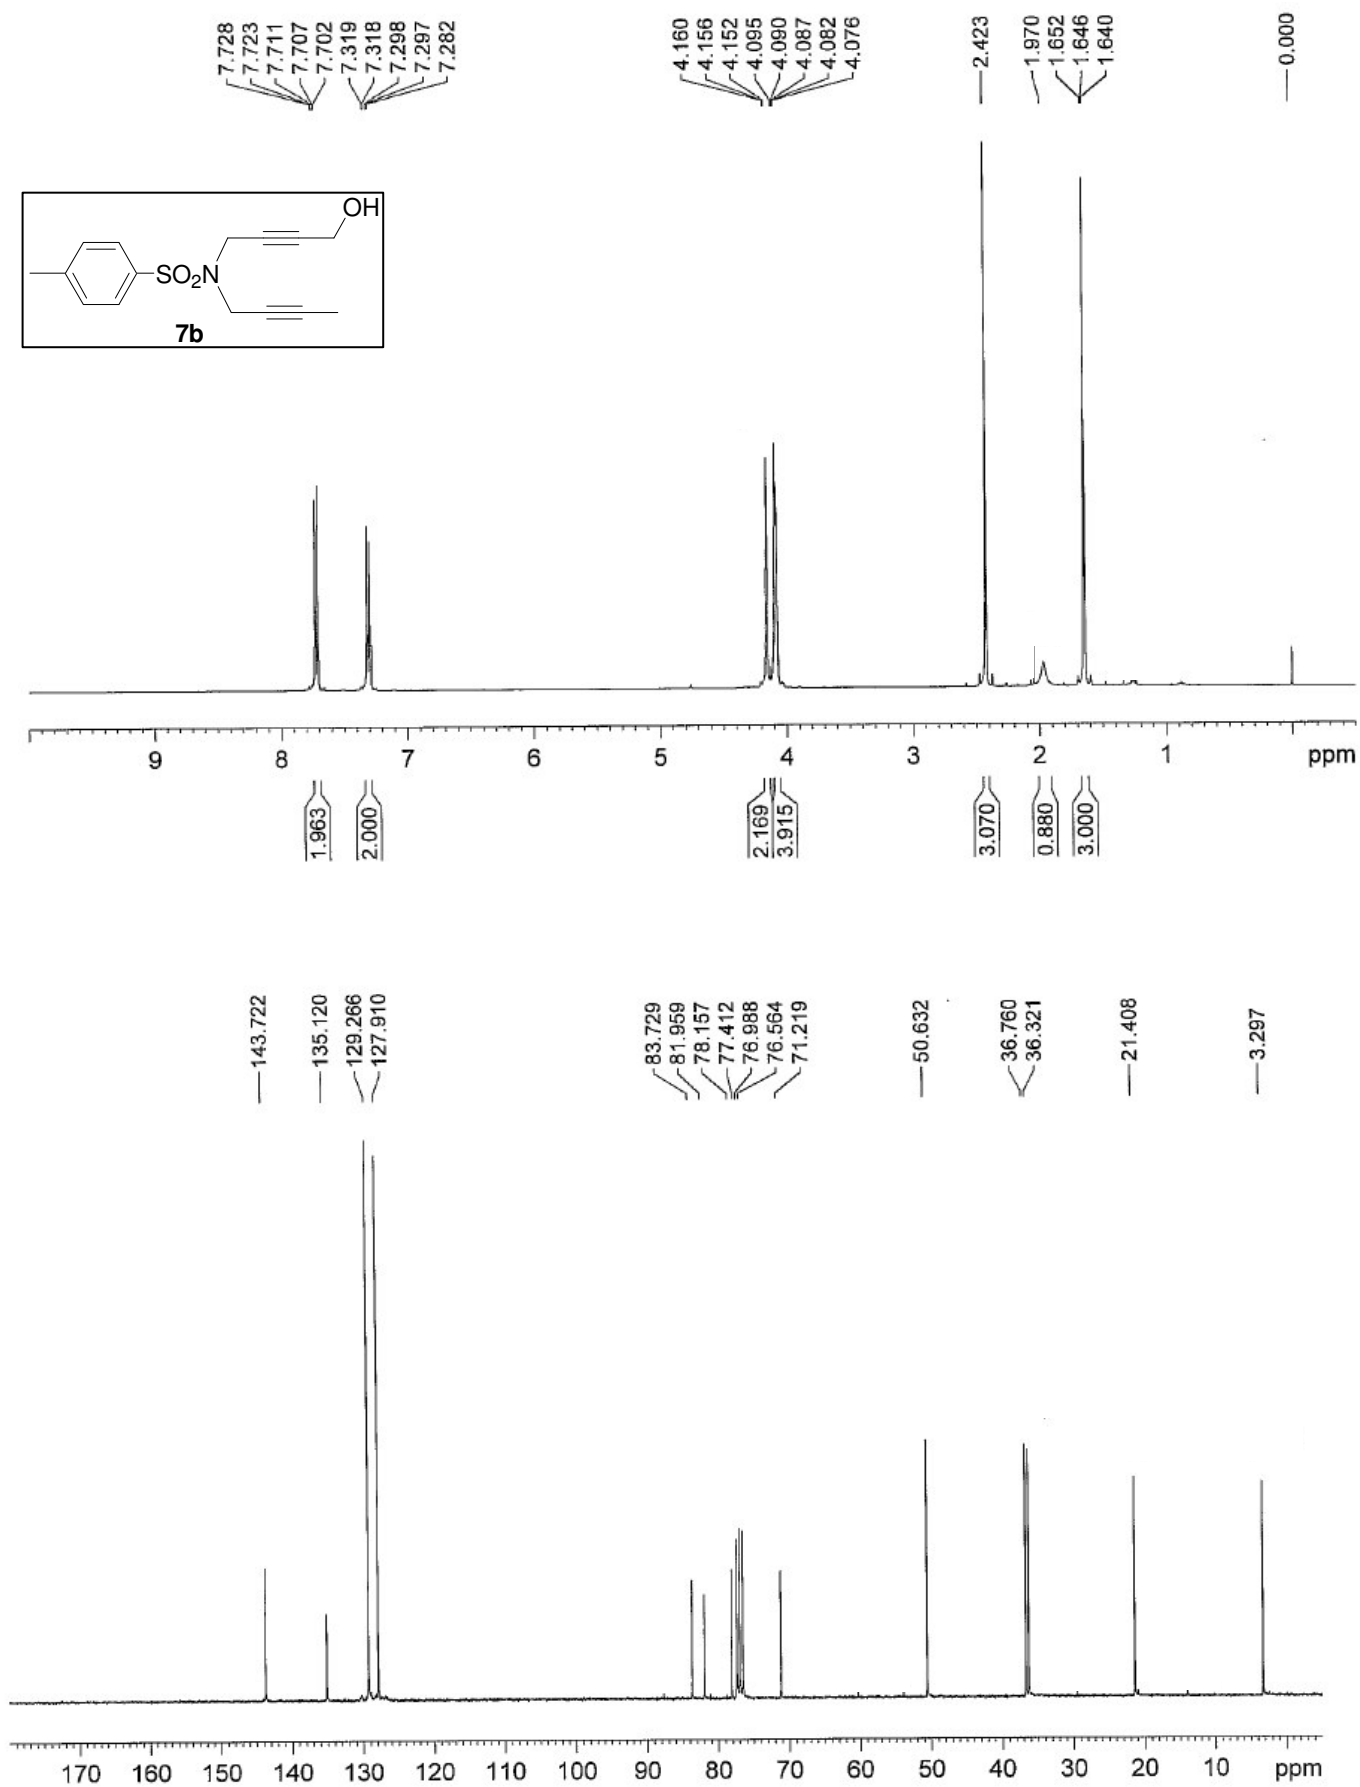

# <sup>1</sup>H and <sup>13</sup>C NMR spectra of phenylalanine derivatives 10a, 11a, 4a-h, 10b, 11b, 8c/9c, 8a/9a, 8b, 9b, and 5a-f

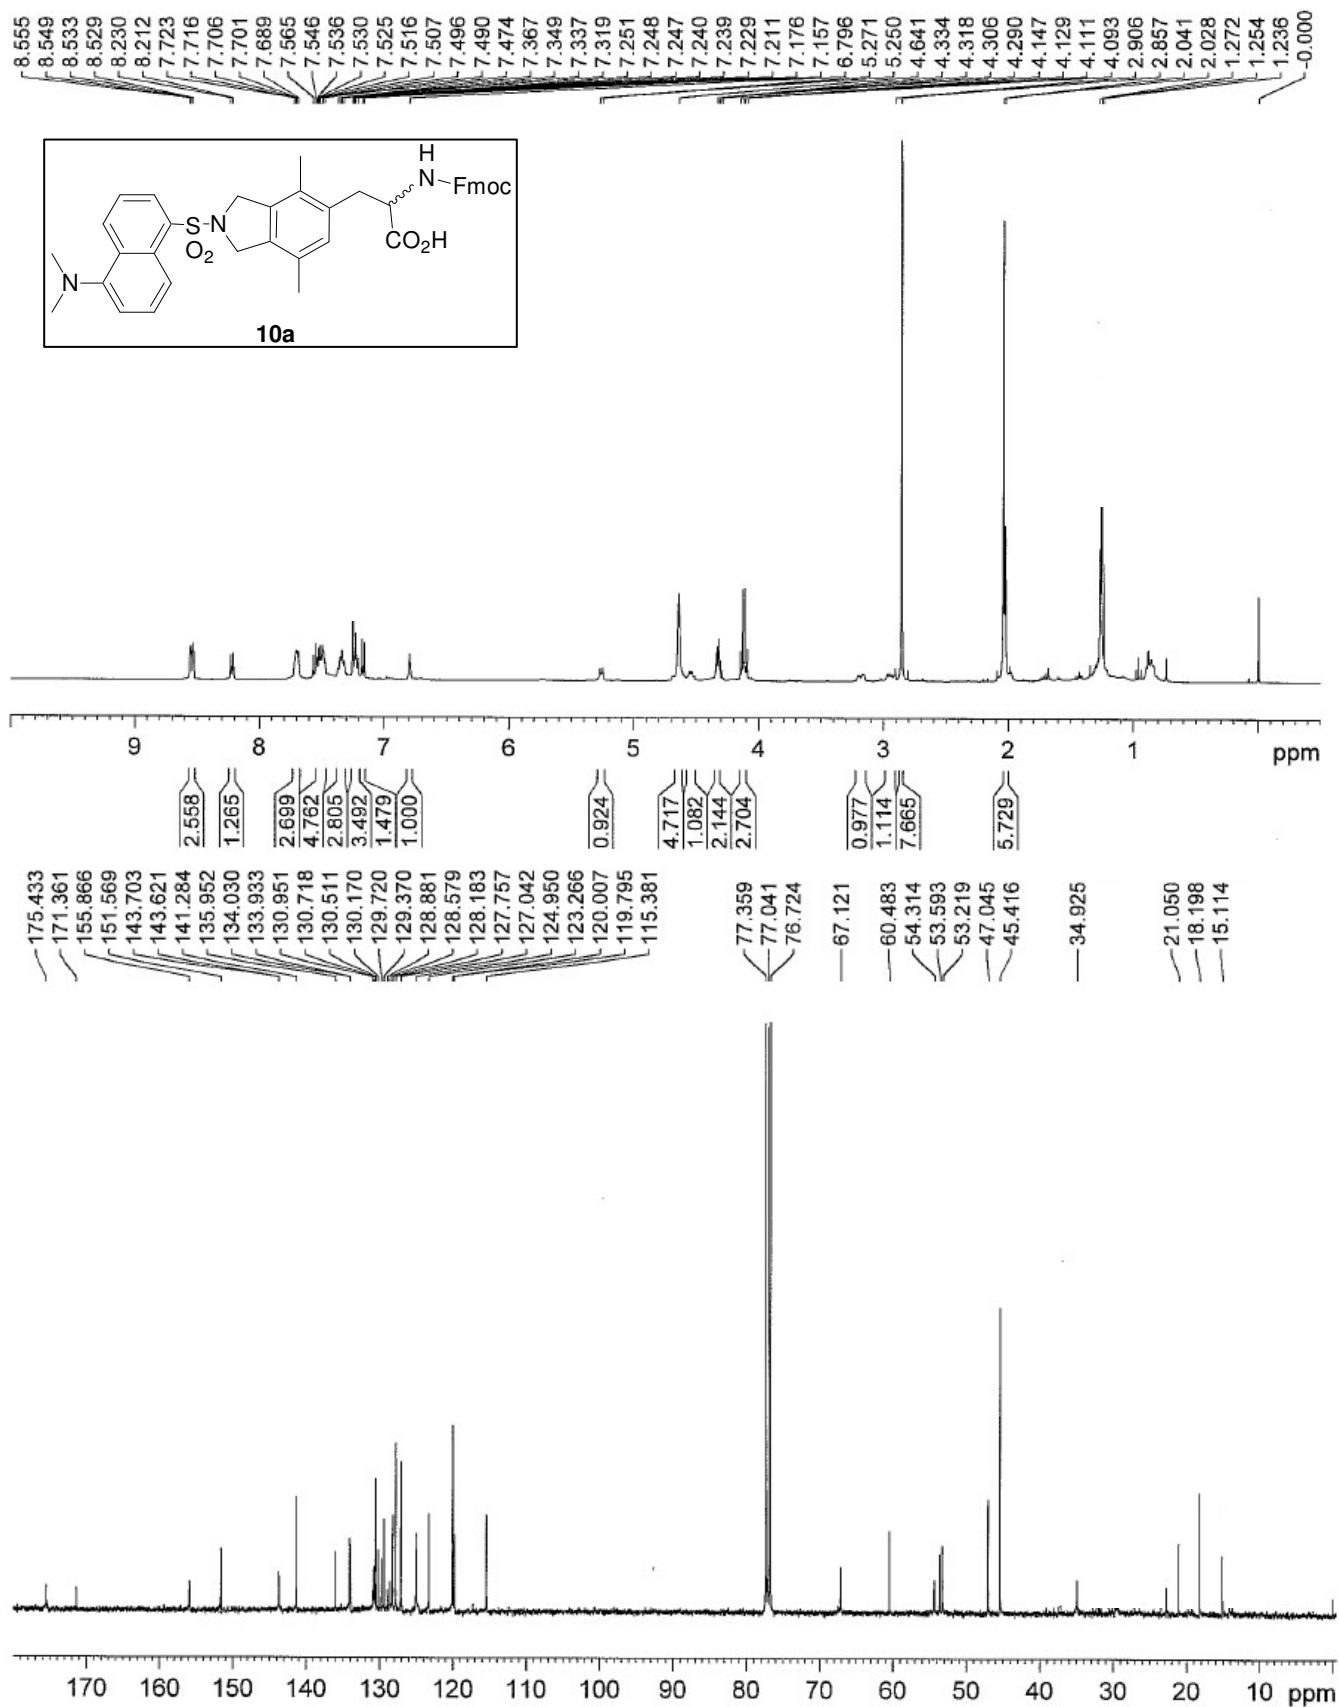

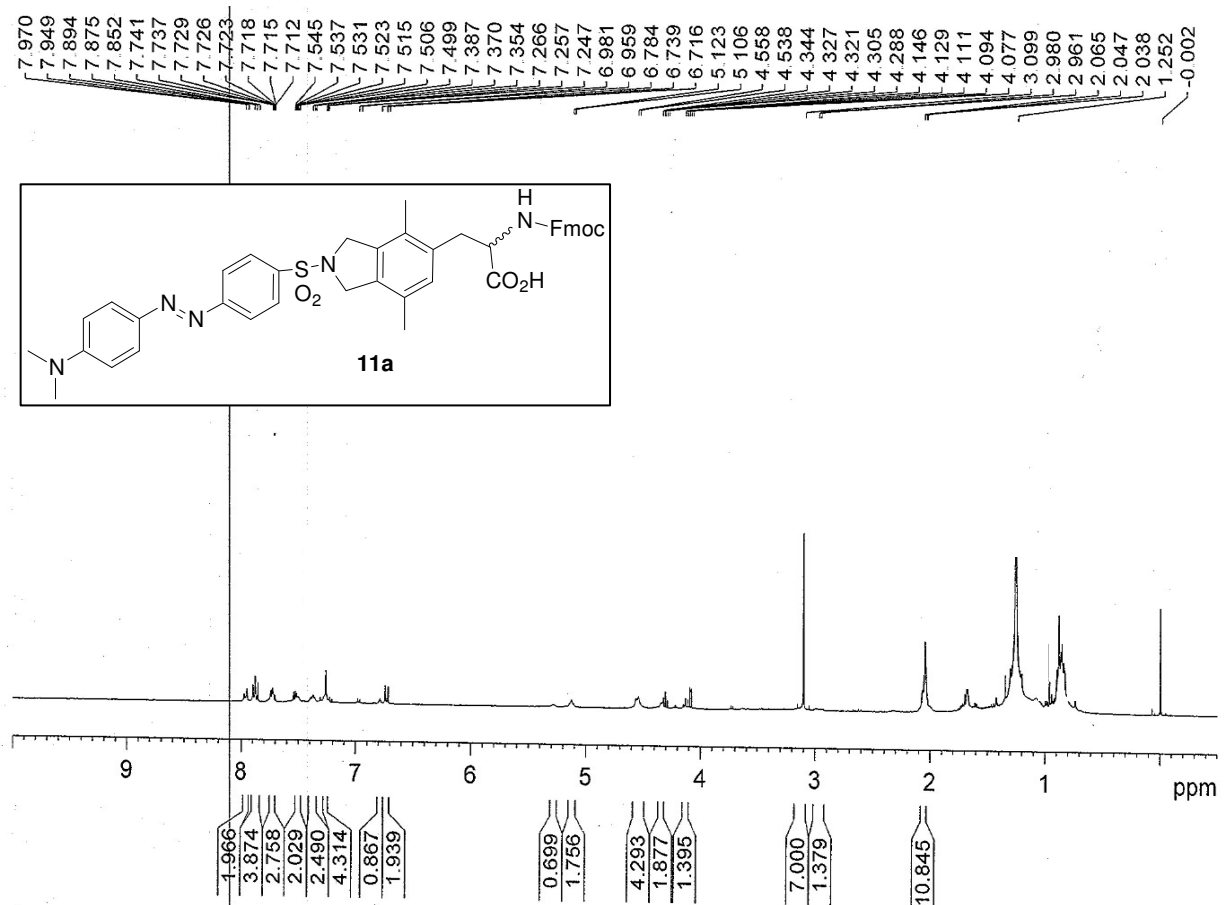

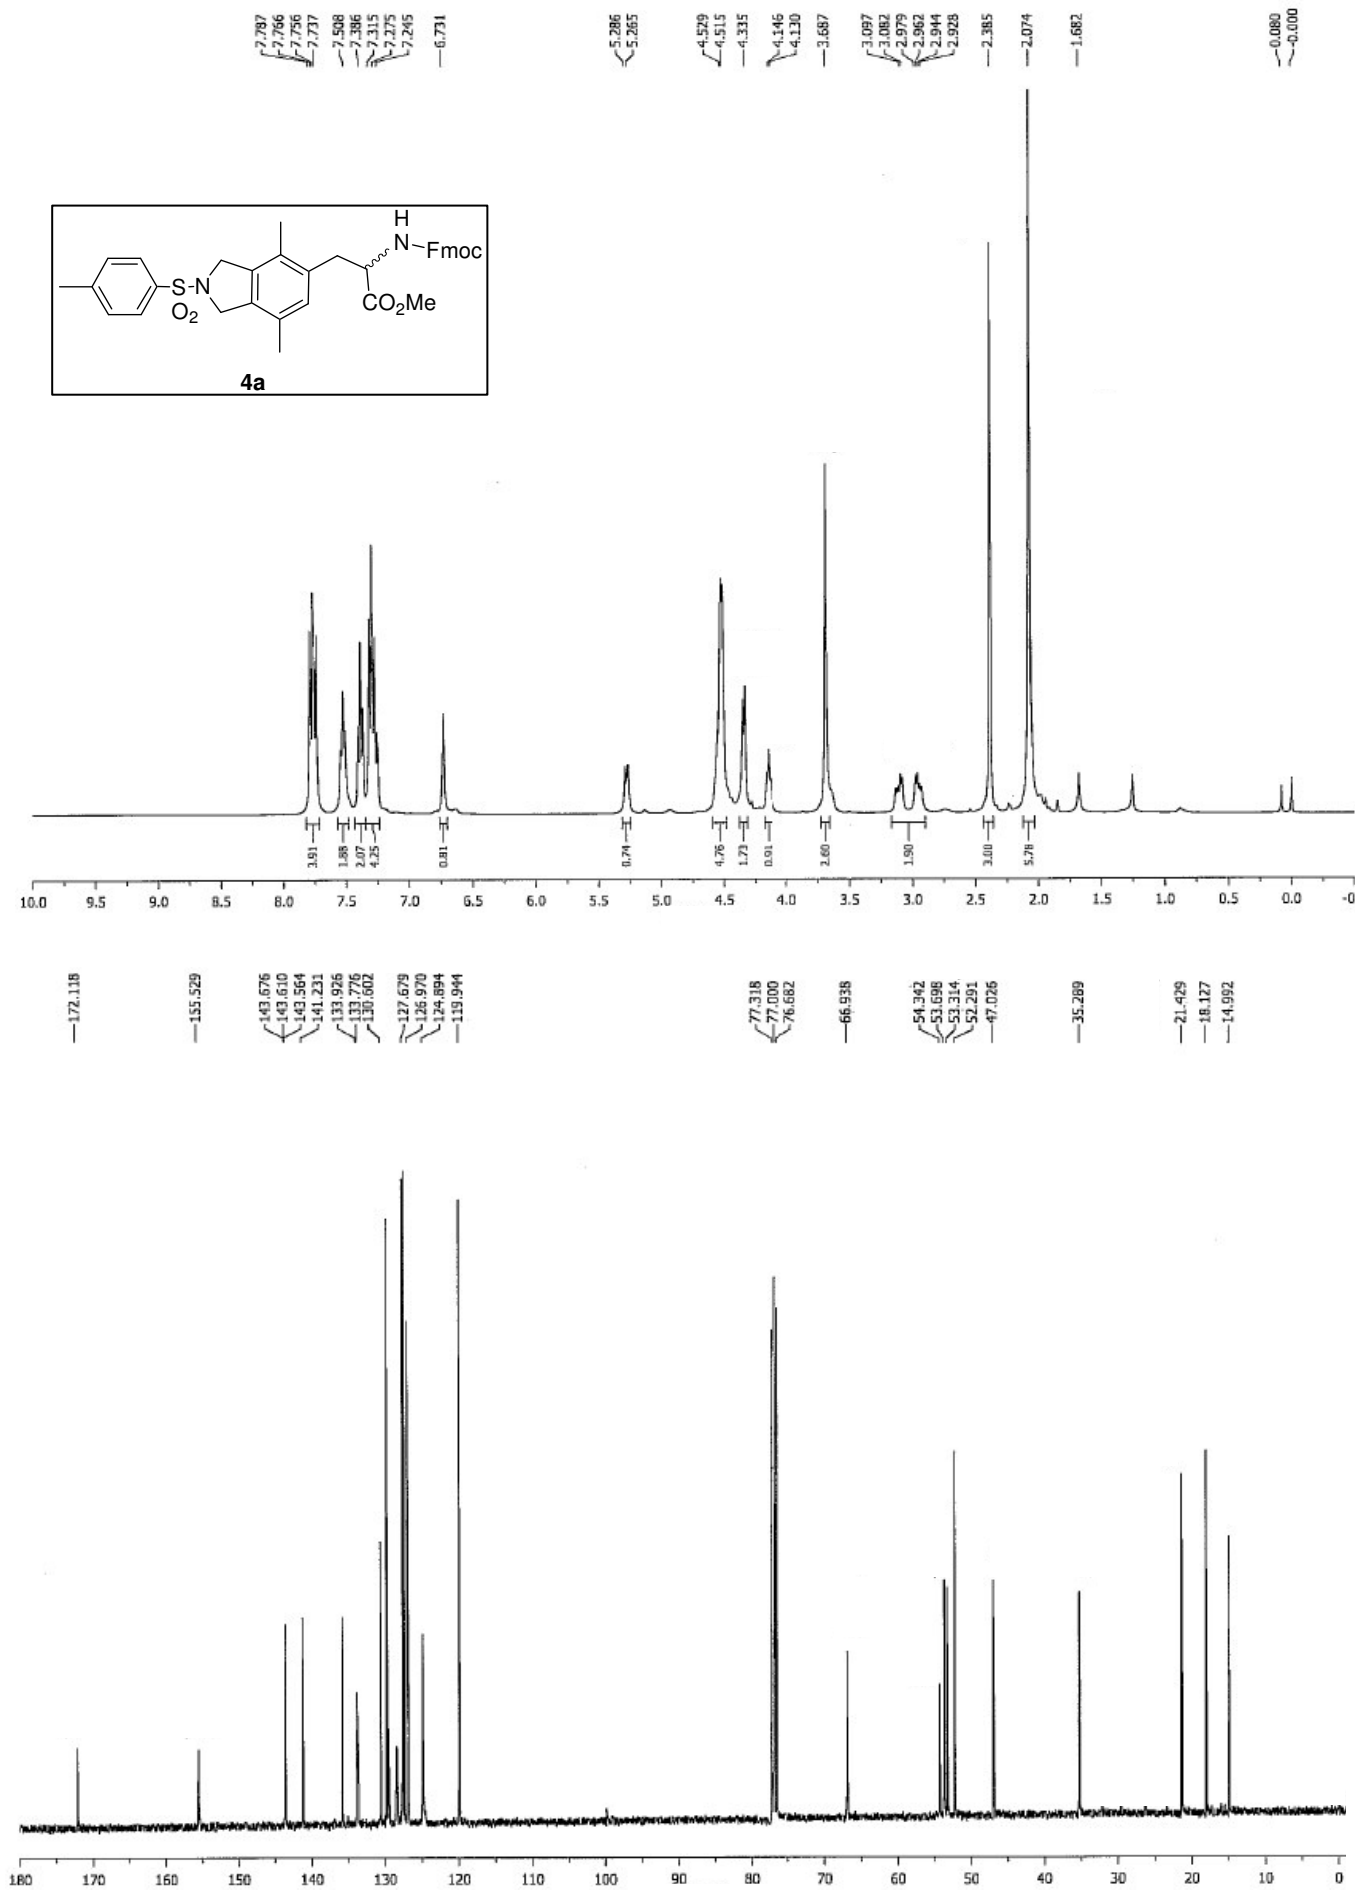

7.785  
7.767  
7.753  
7.732  
7.569  
7.543  
7.527  
7.434  
7.423  
7.418  
7.405  
7.397  
7.385  
7.324  
7.321  
7.317  
7.315  
7.305  
7.303  
7.298  
7.287  
7.284  
7.277  
7.265  
7.069  
7.050  
6.938  
6.918  
6.848  
5.199  
5.179  
4.634  
4.619  
4.605  
4.599  
4.585  
4.565  
4.535  
4.473  
4.455  
4.447  
4.429  
4.377  
4.361  
4.351  
4.334  
4.188  
4.179  
4.162  
3.708  
3.113  
3.099  
3.078  
3.064  
3.042  
3.028  
3.008  
2.993  
2.380

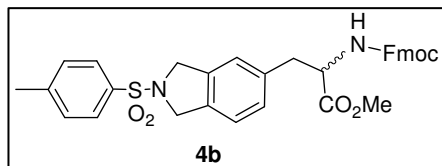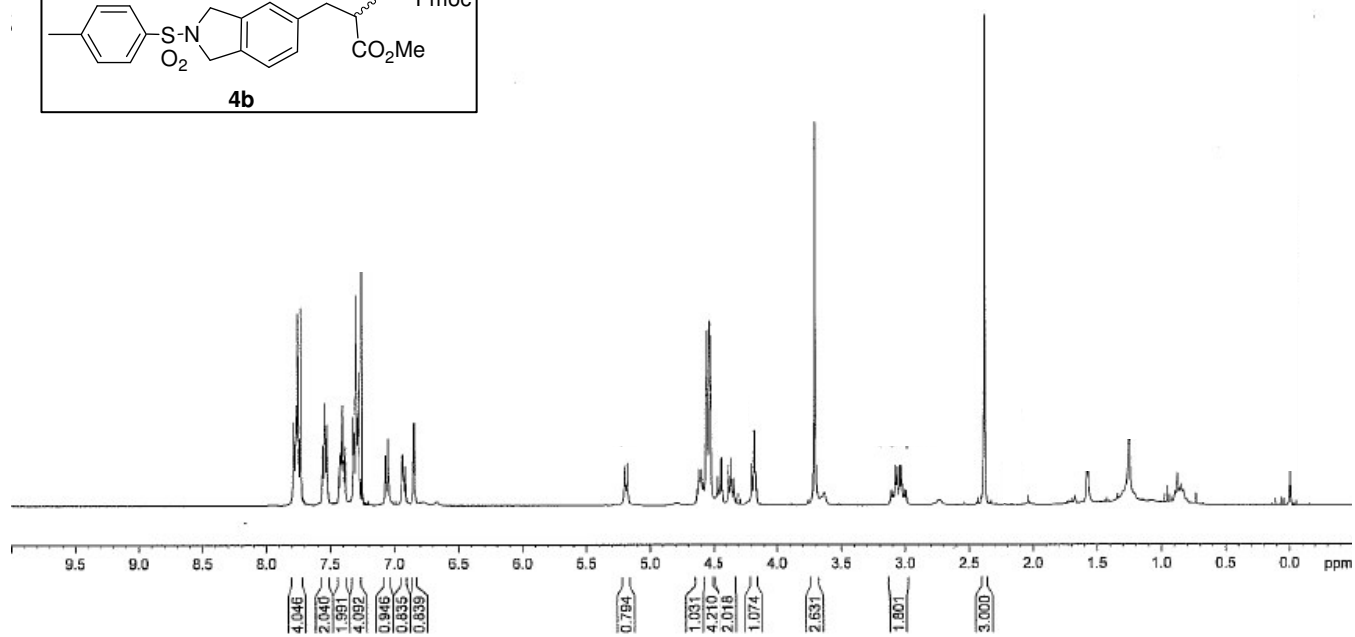

171.64

155.46  
143.708  
143.618  
143.573  
141.277  
136.585  
135.566  
135.018  
133.676  
129.762  
128.755  
127.718  
127.528  
127.509  
126.991  
126.977  
124.924  
124.857  
123.359  
122.876  
119.876  
119.854  
119.532

77.273  
77.156  
76.956  
76.658

56.753

54.687  
53.480  
53.372  
52.348

47.116

37.962

21.412

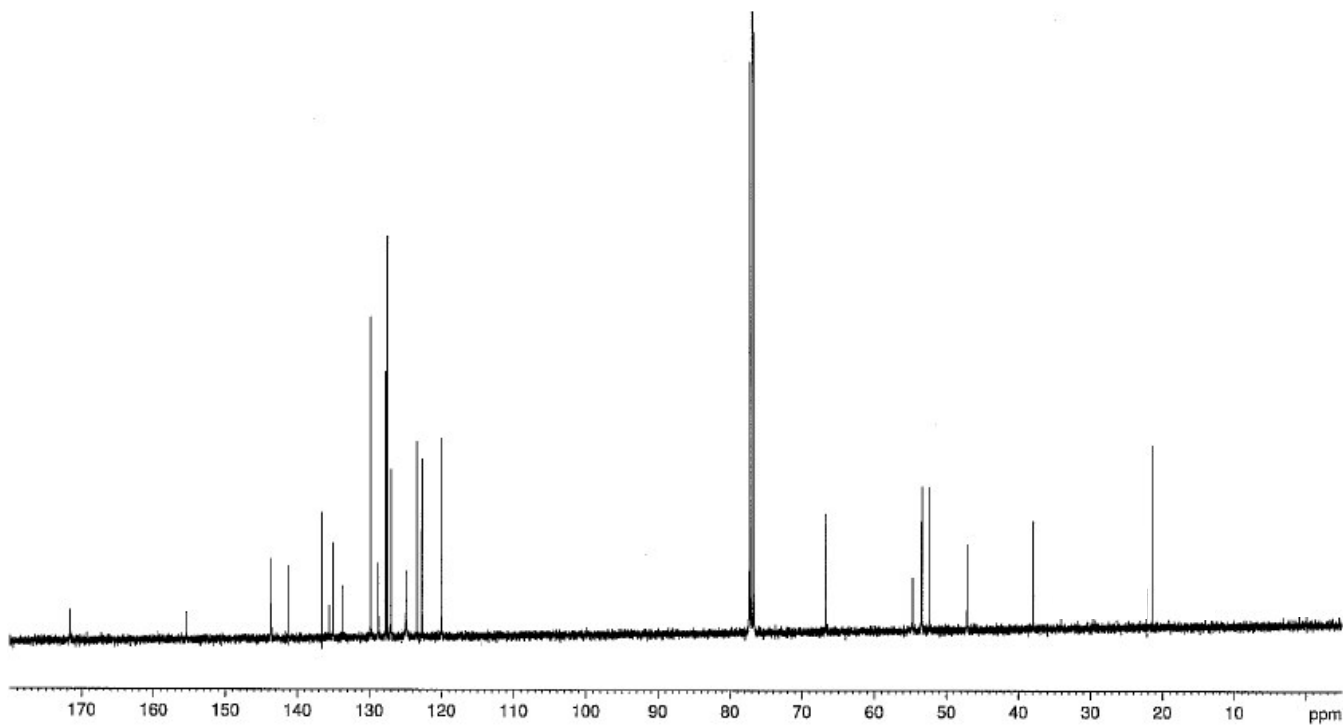





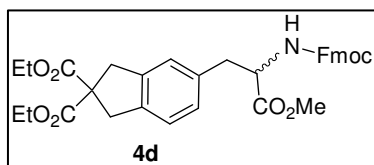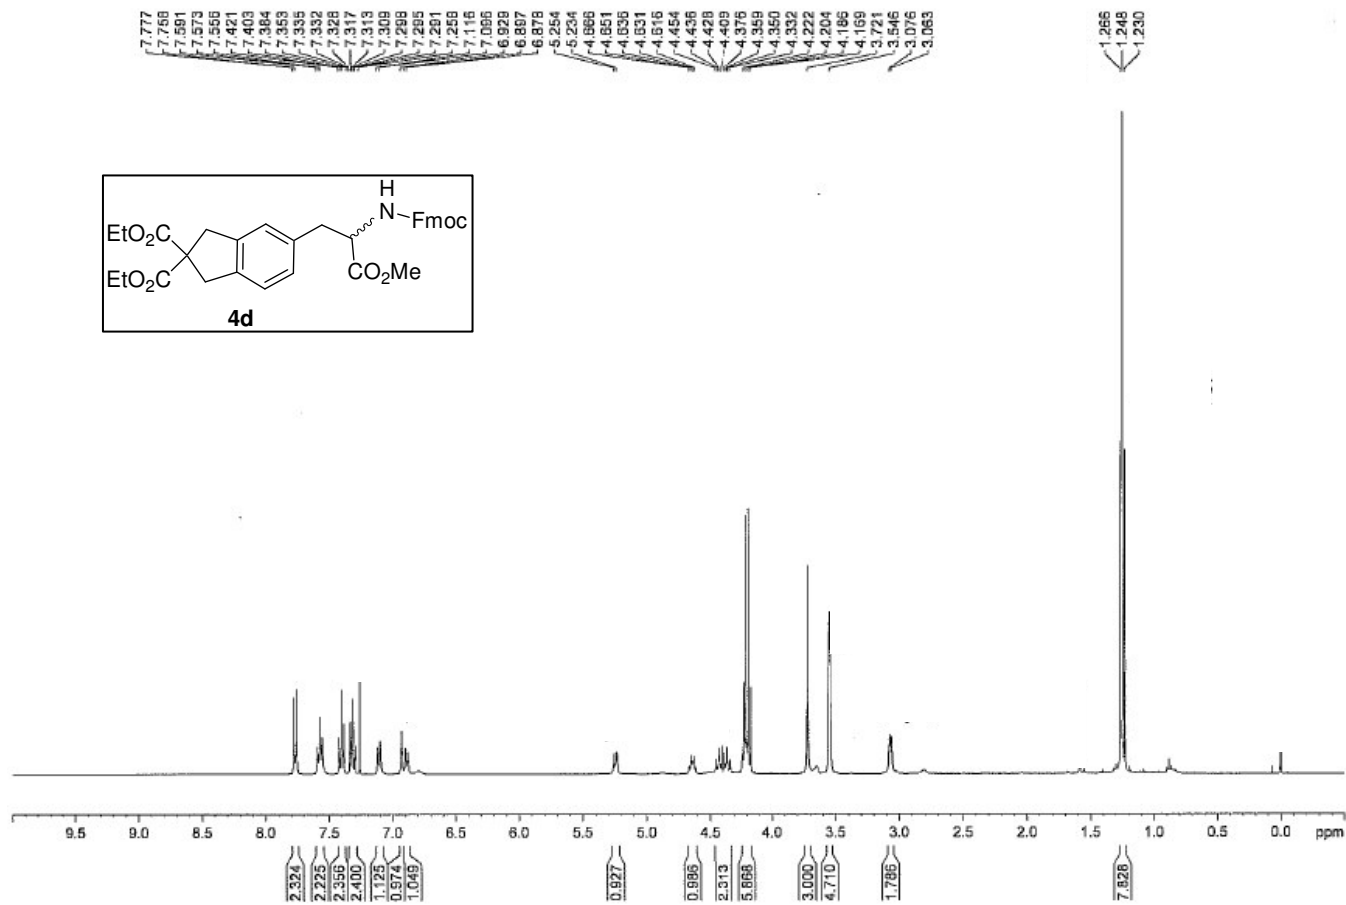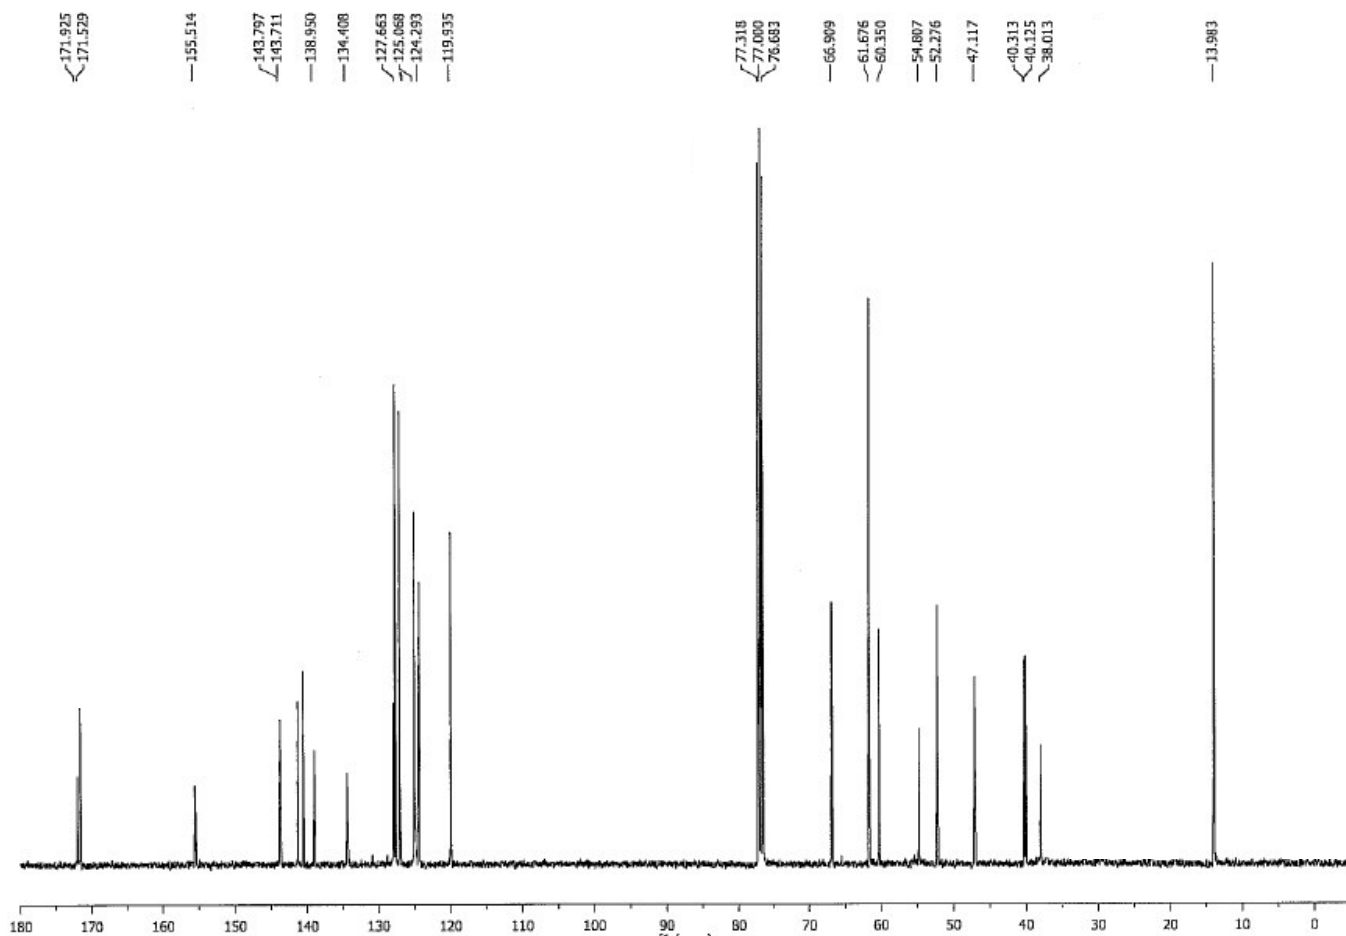

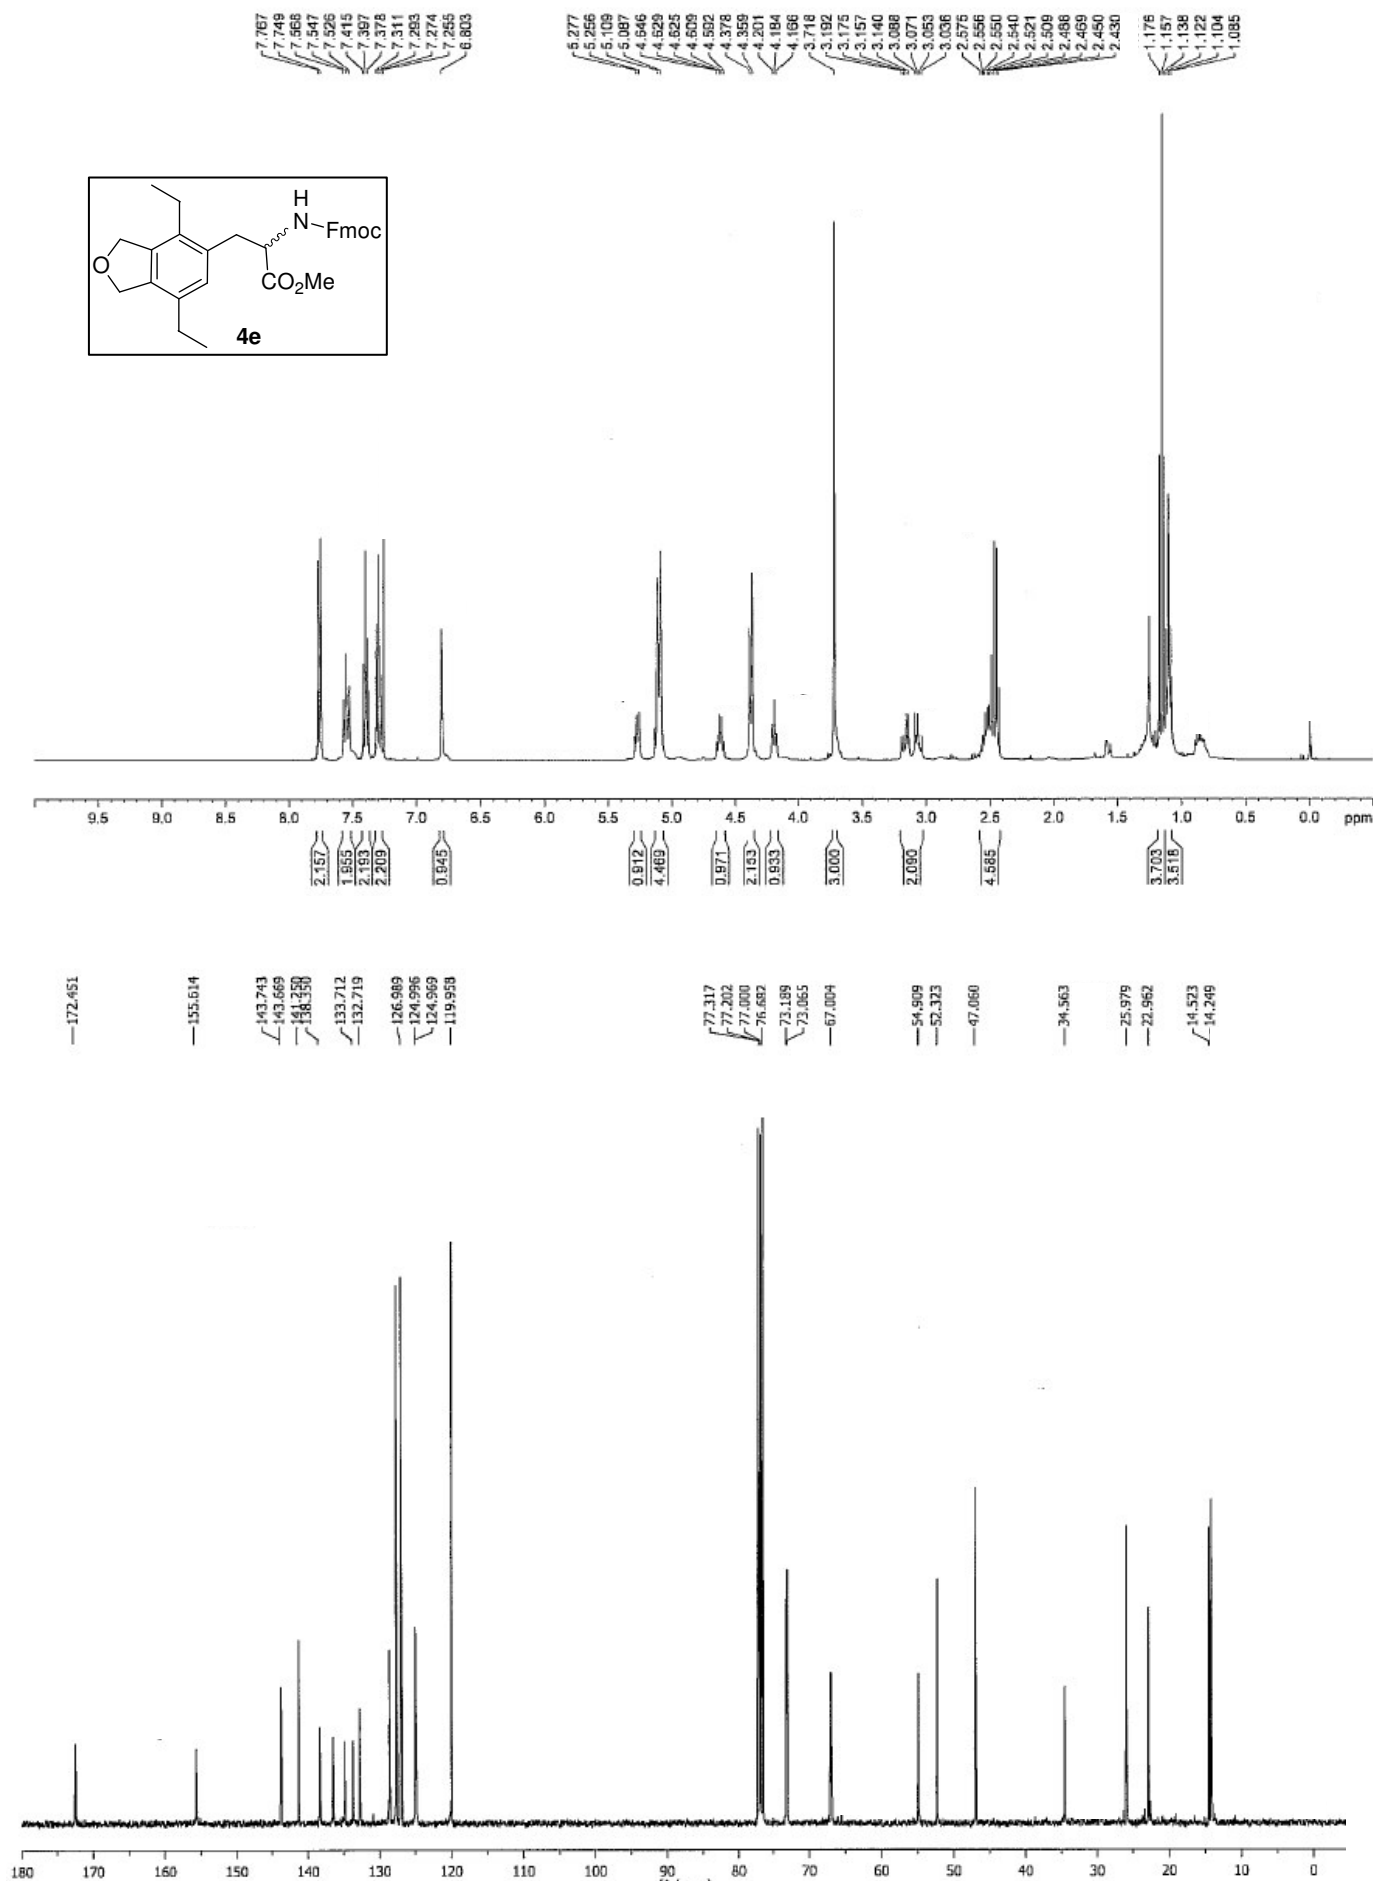

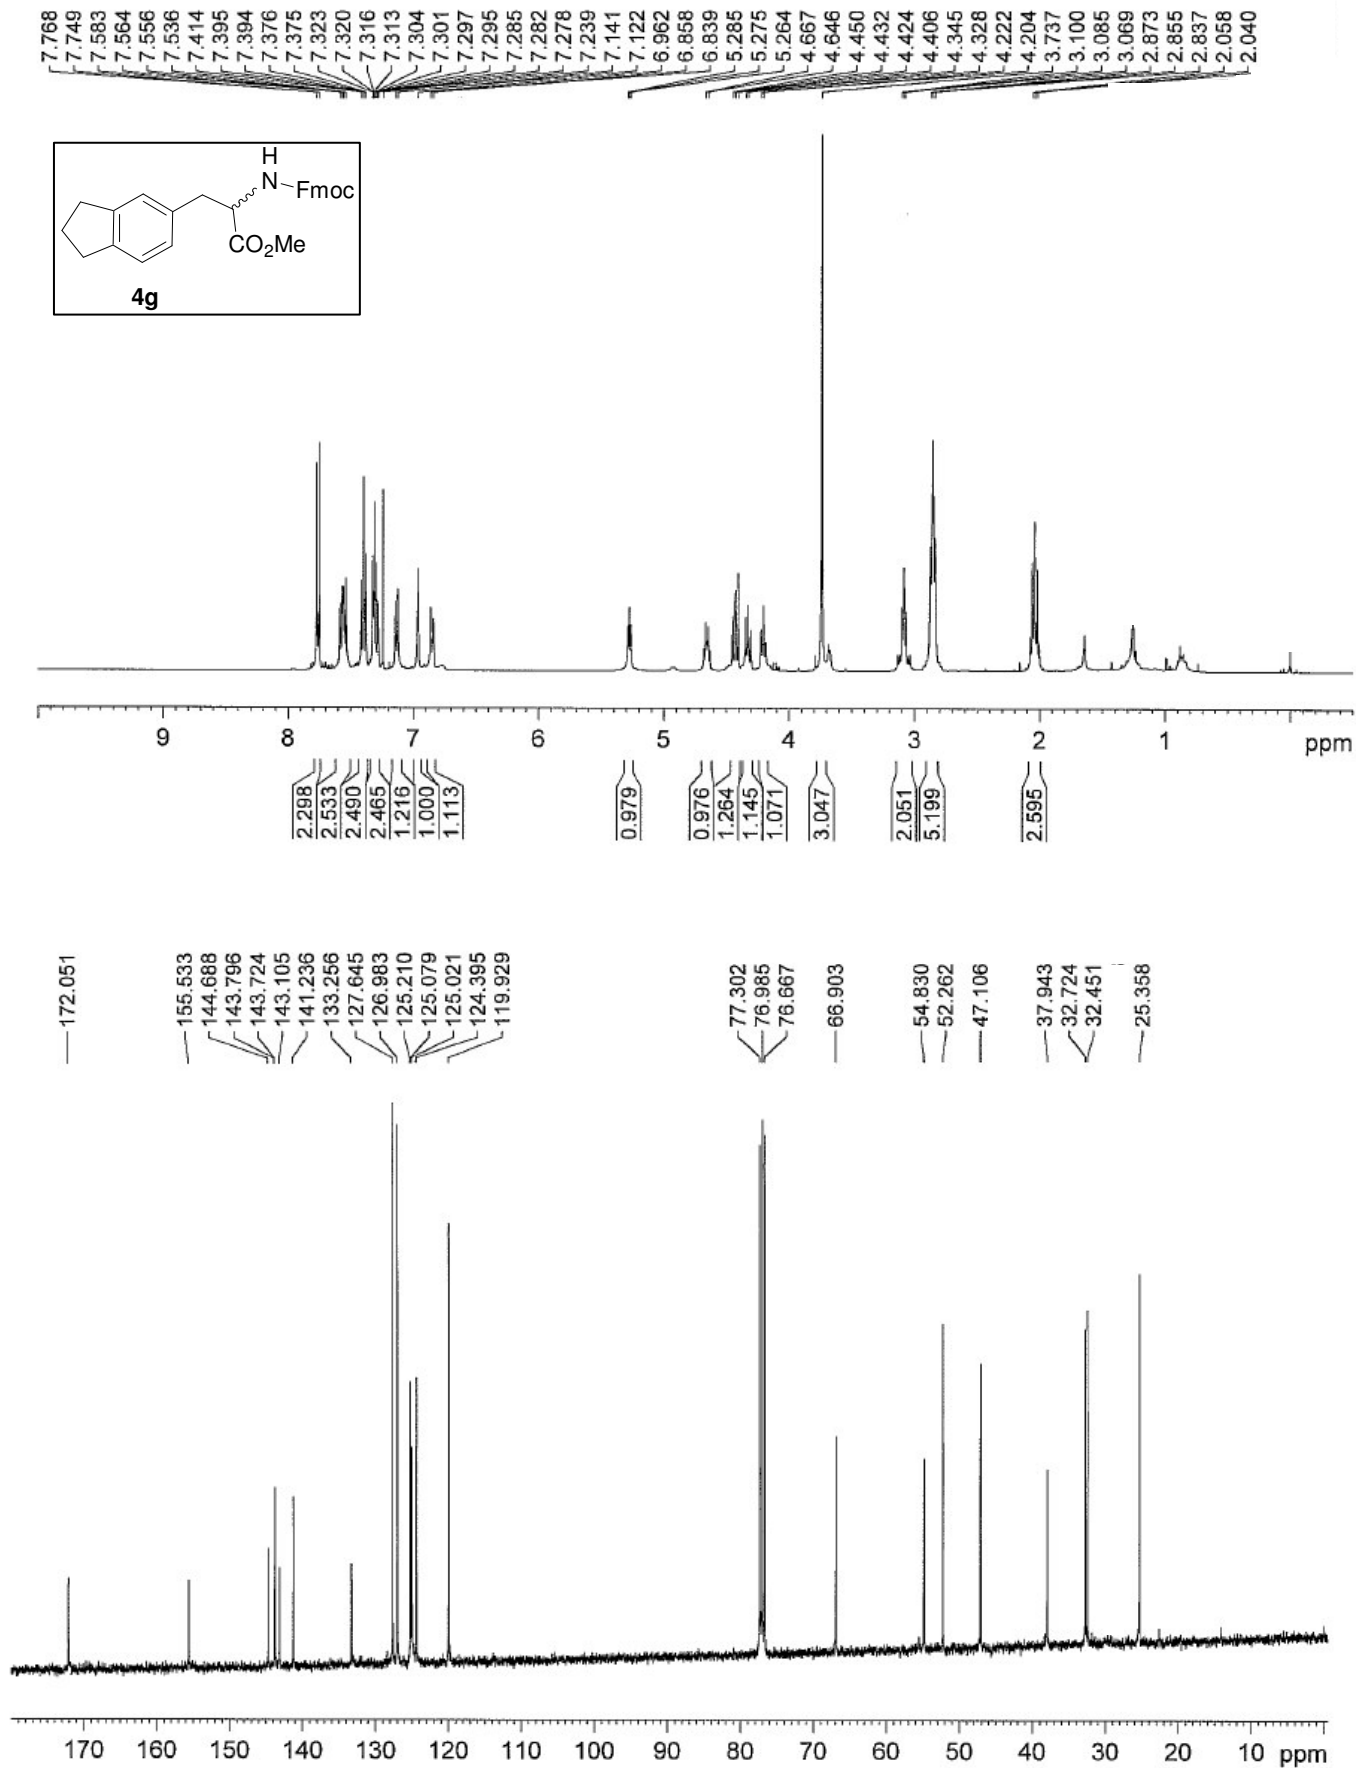

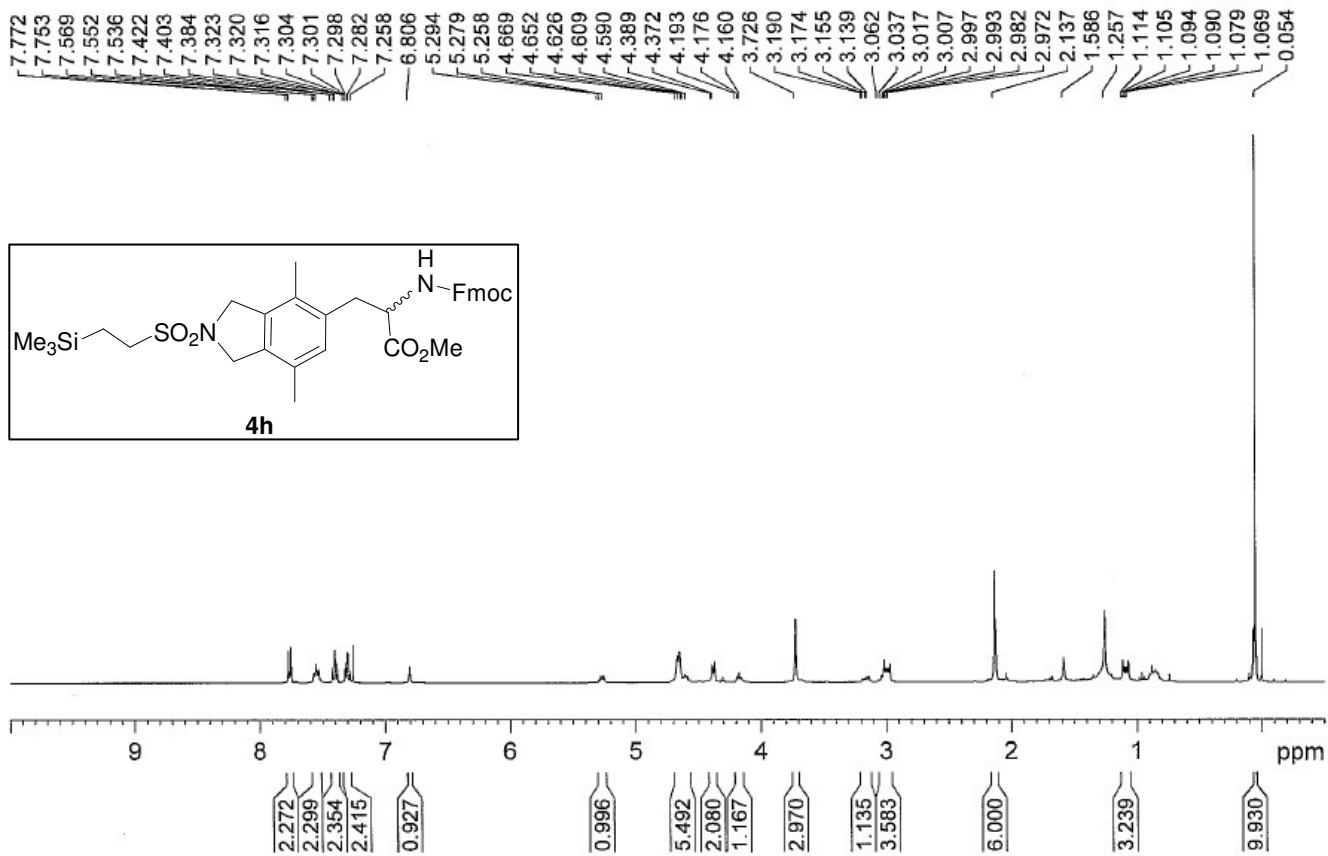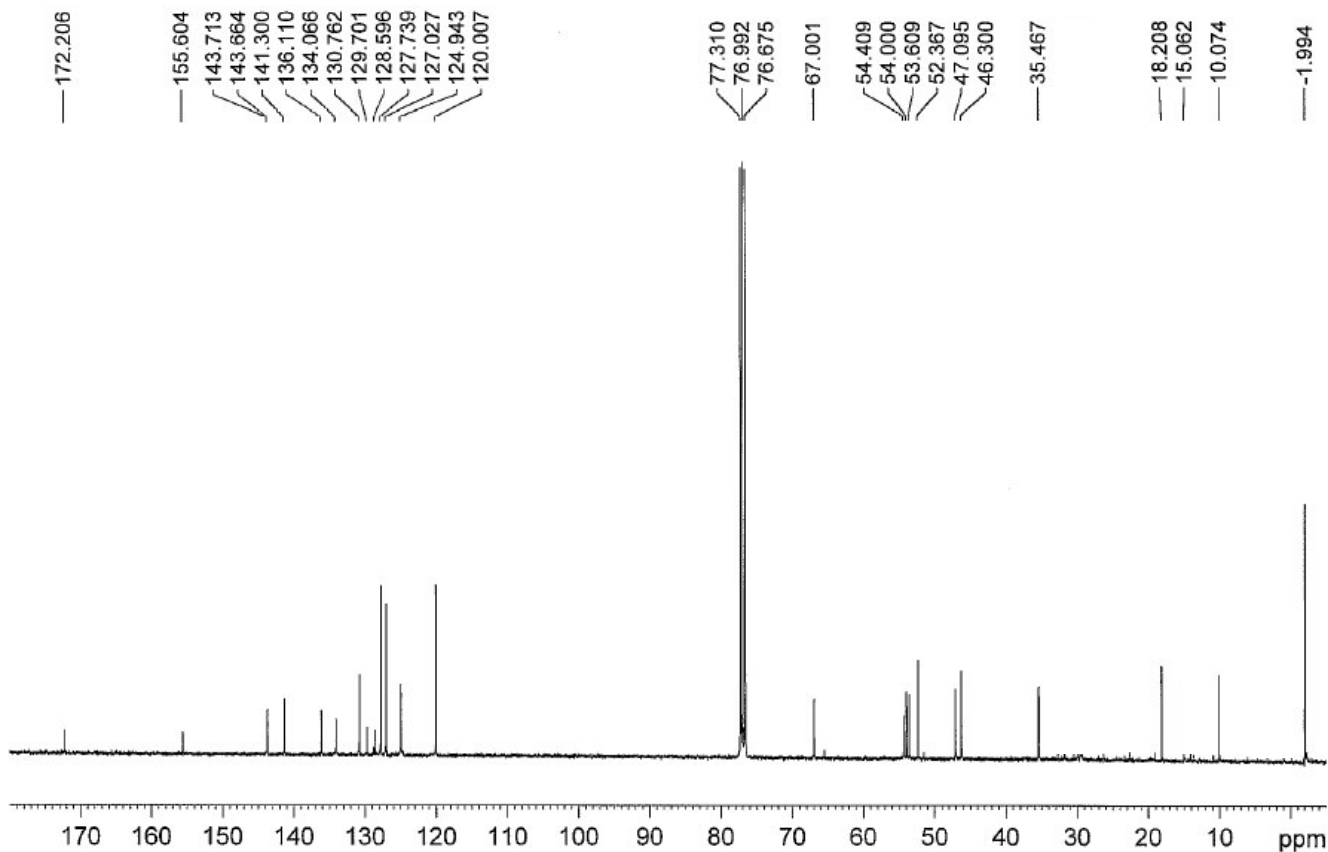

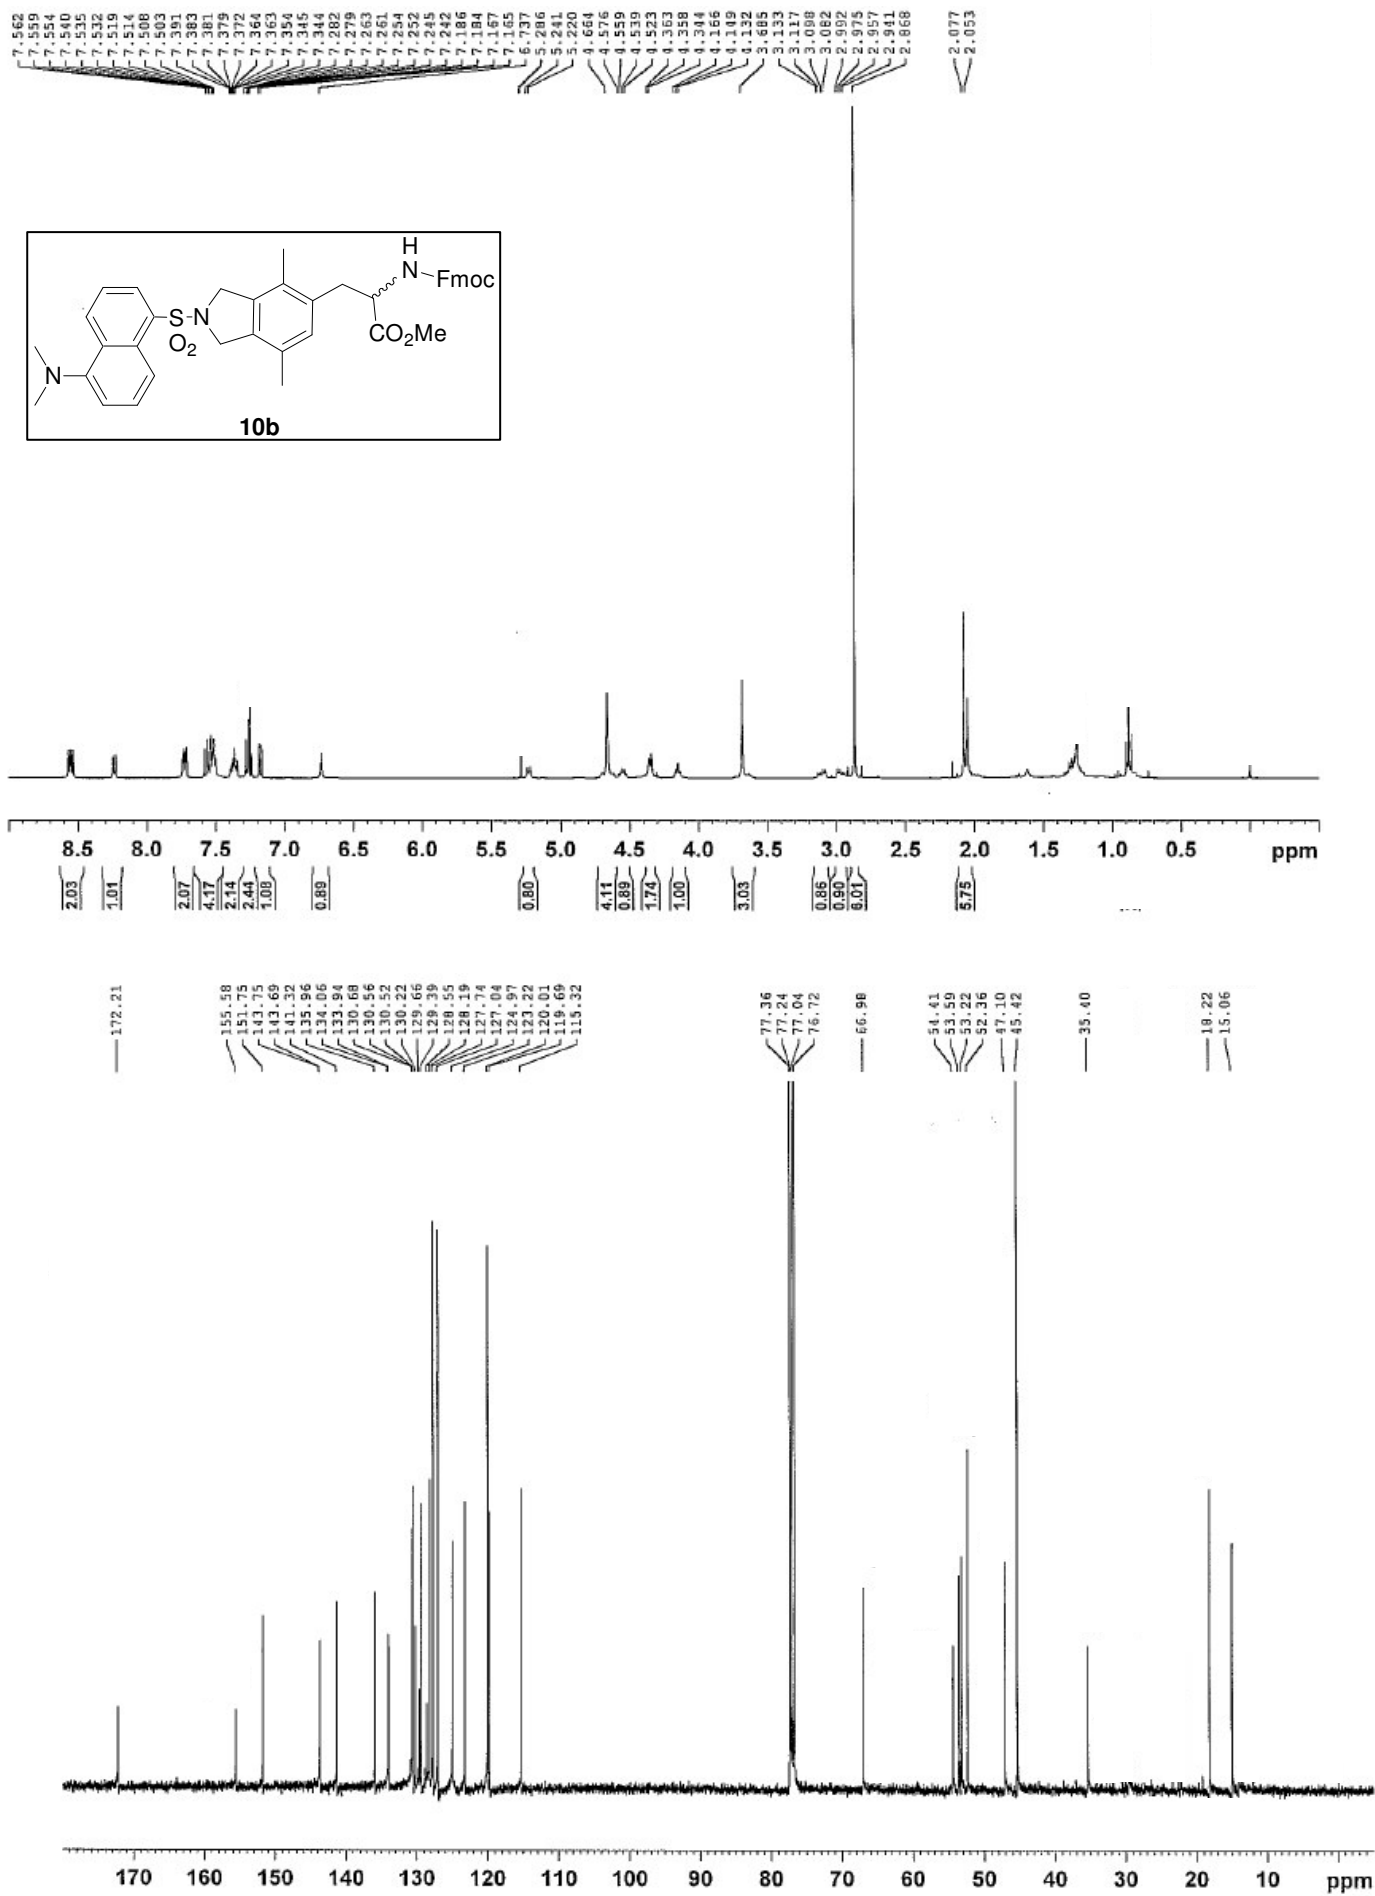

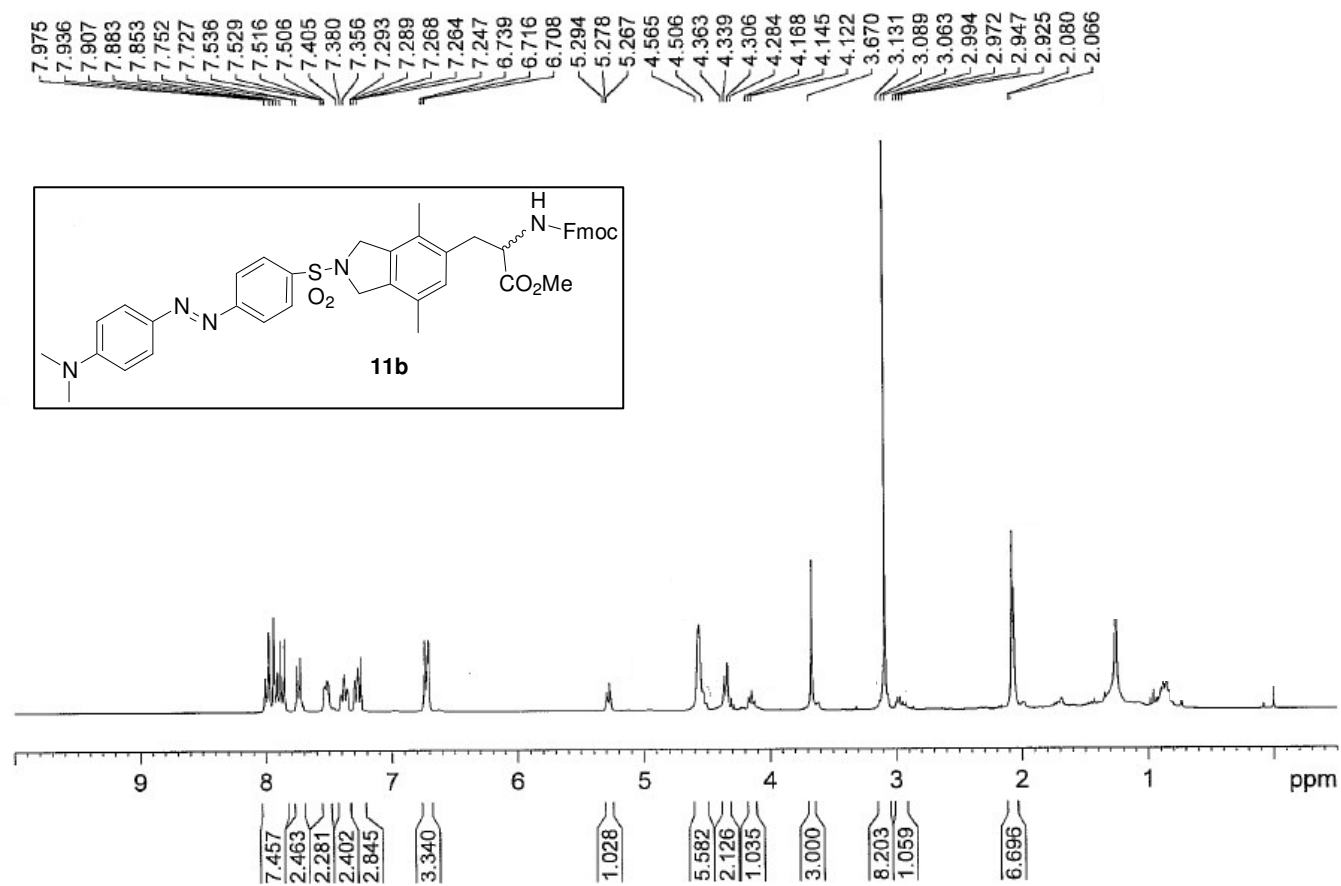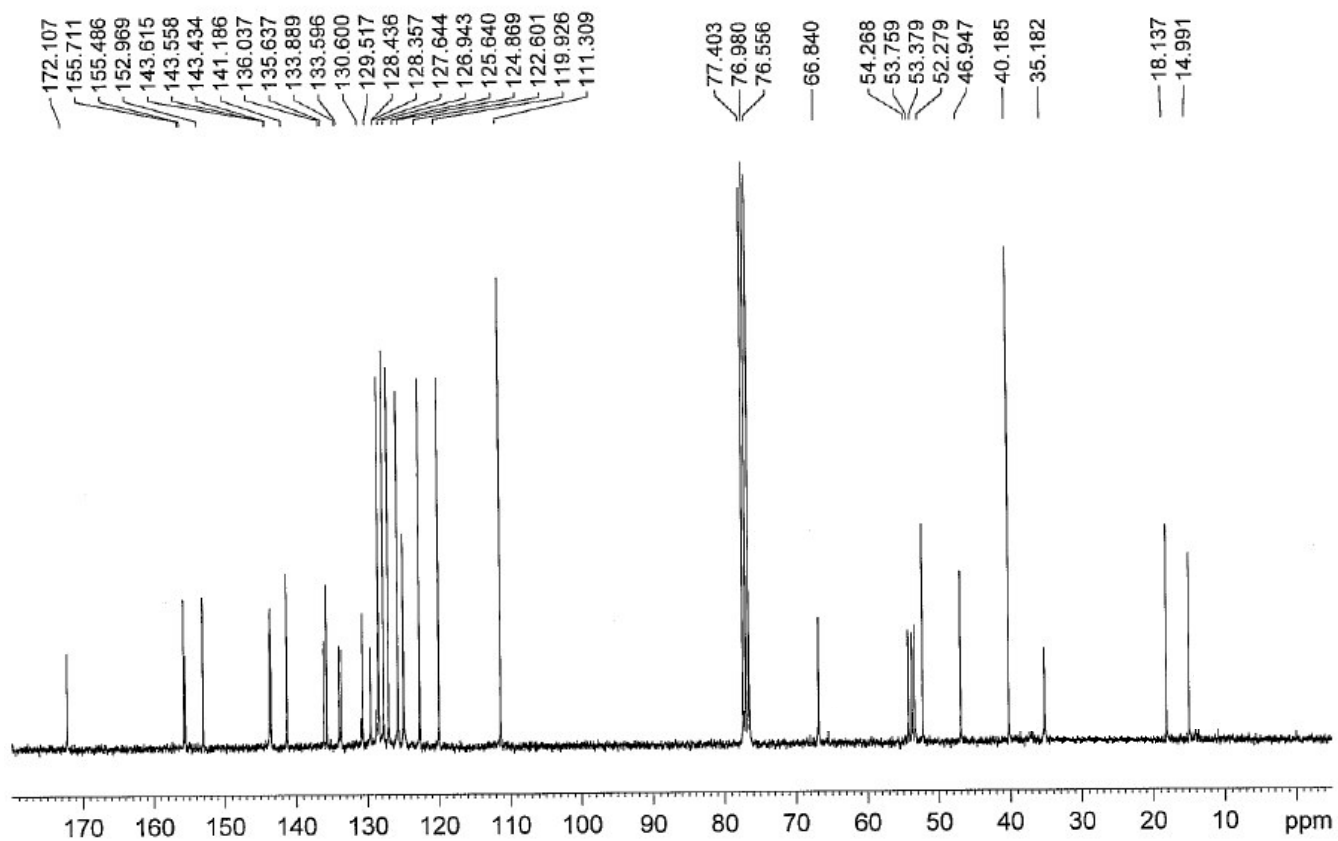

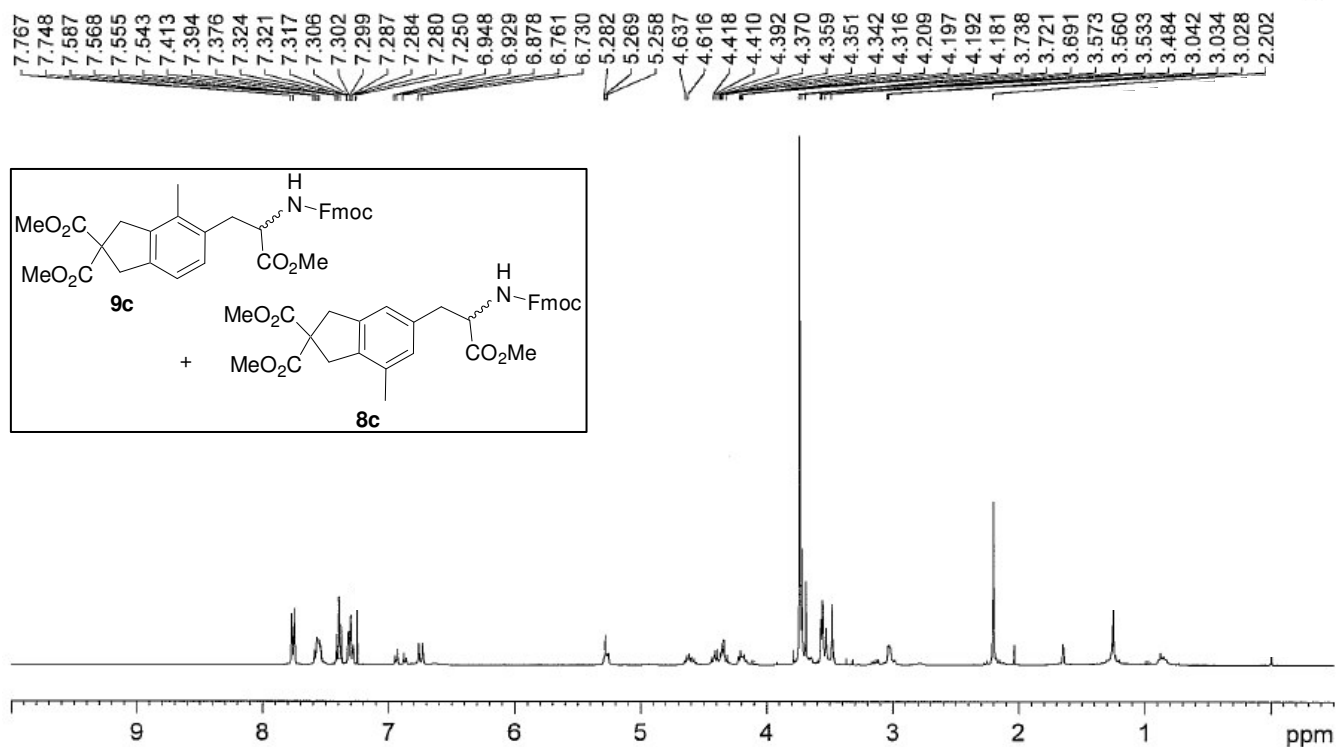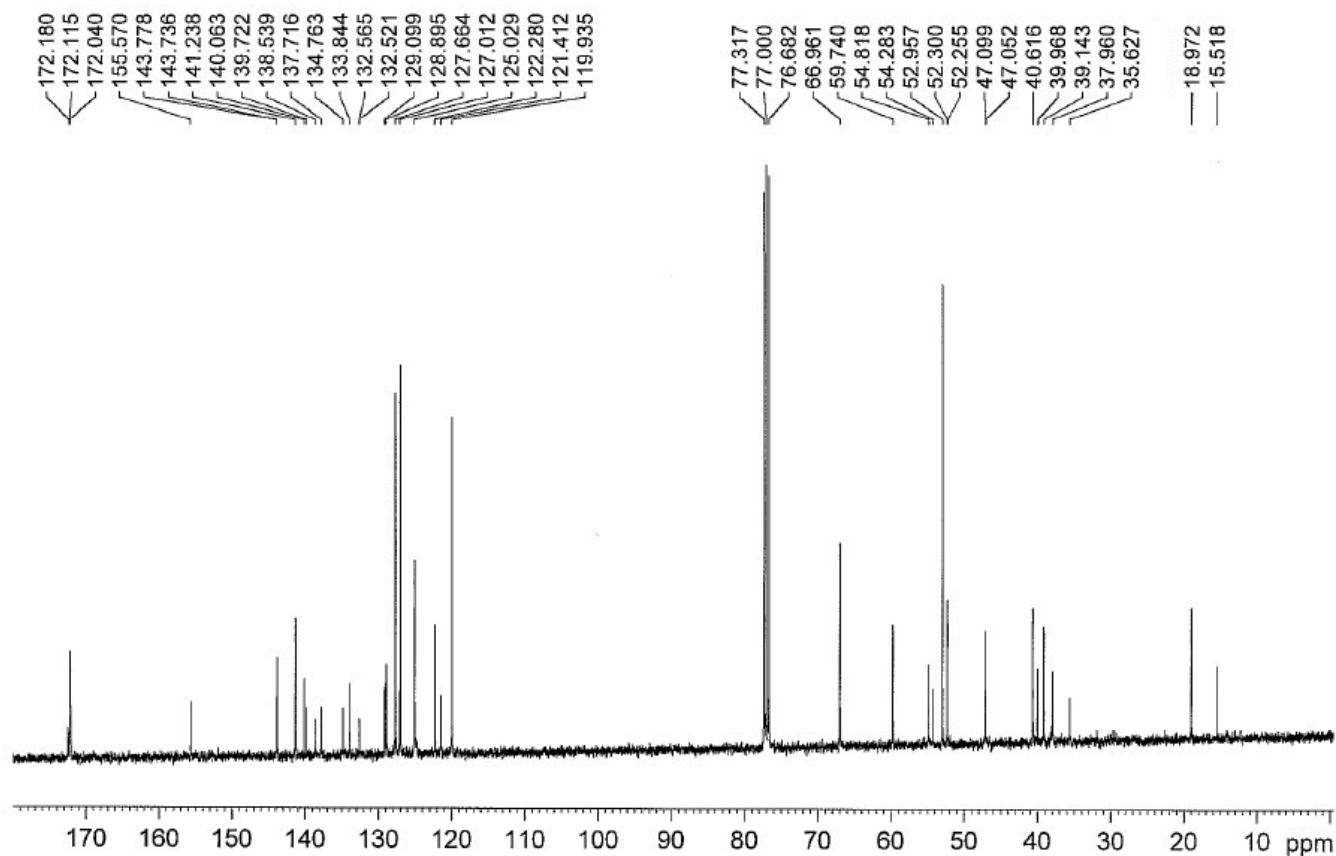

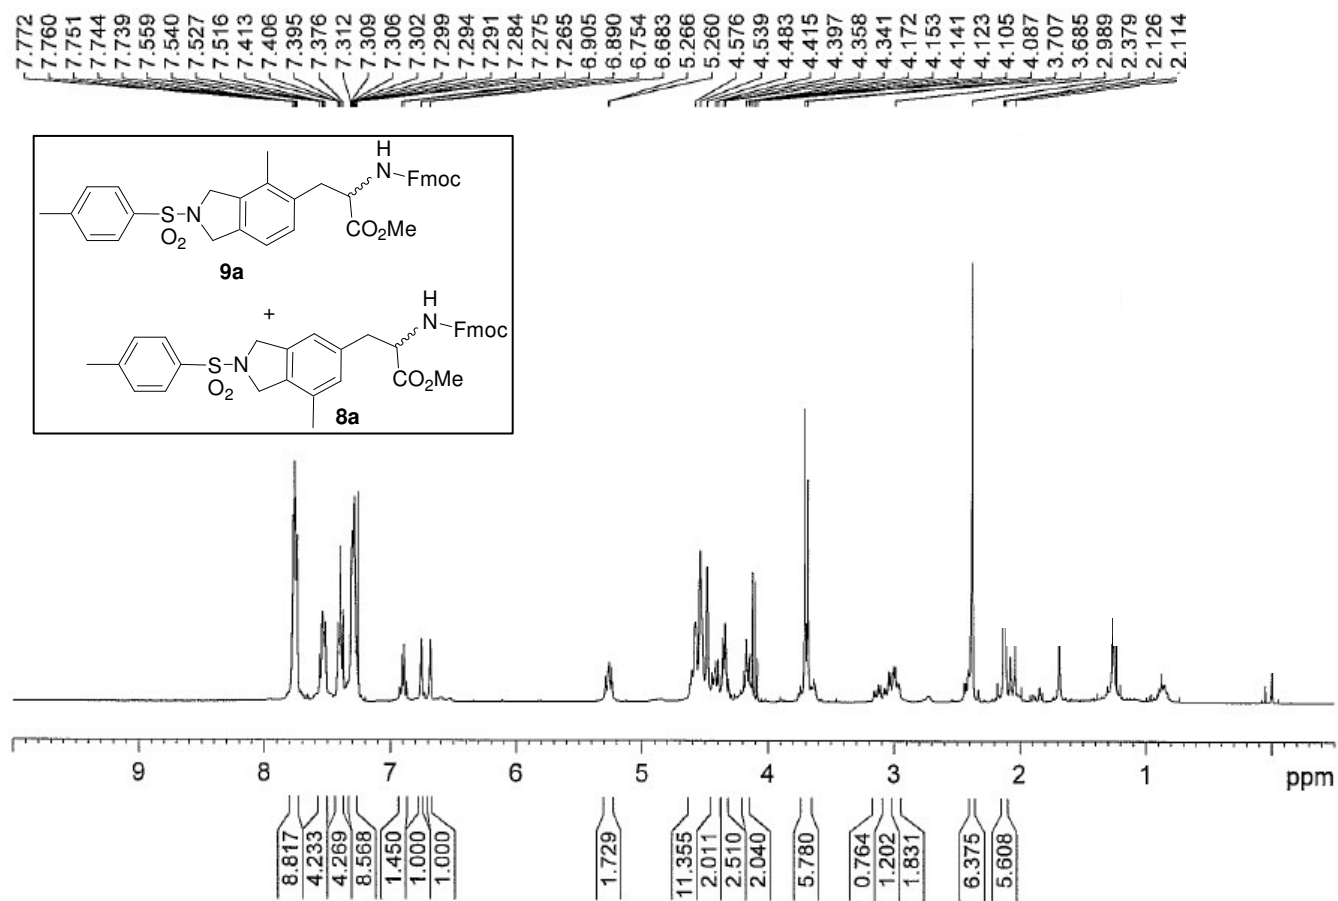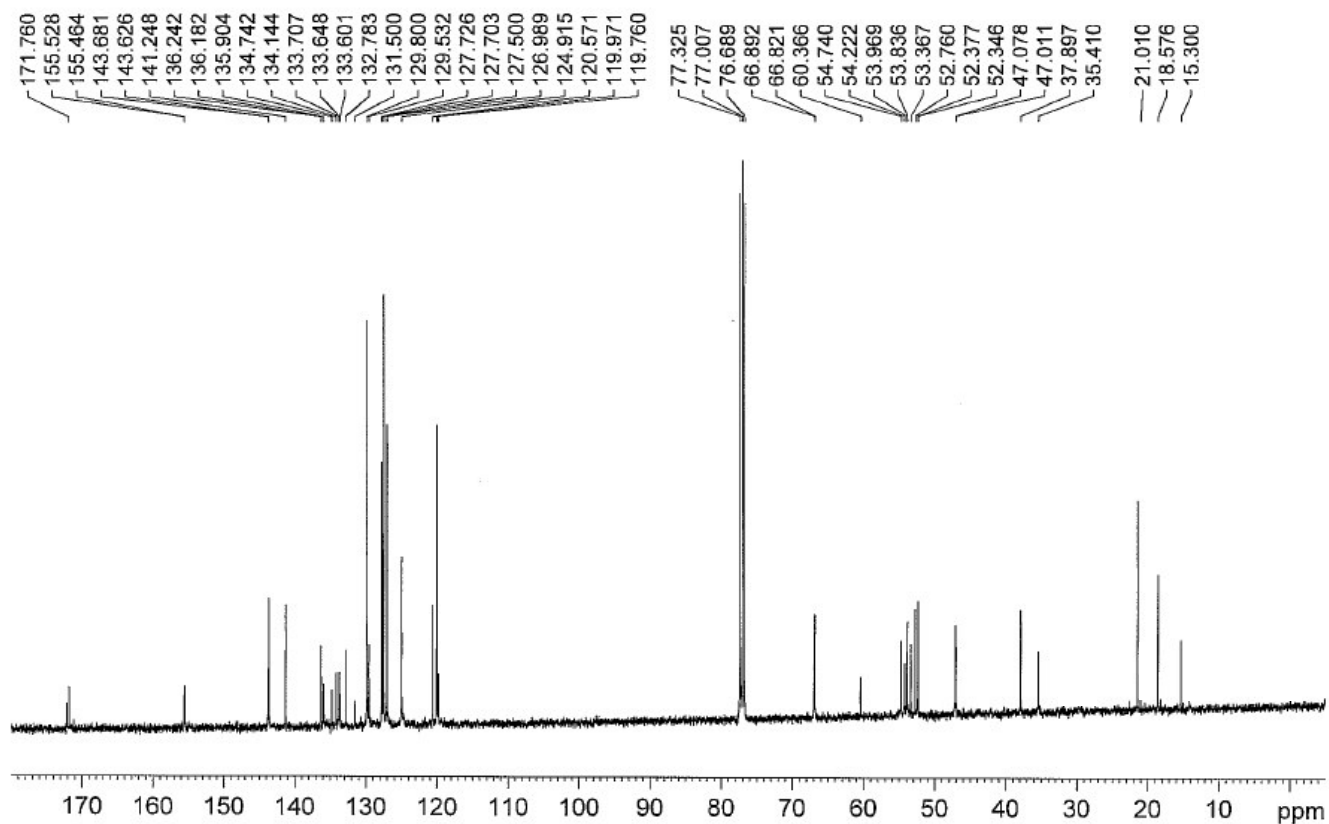



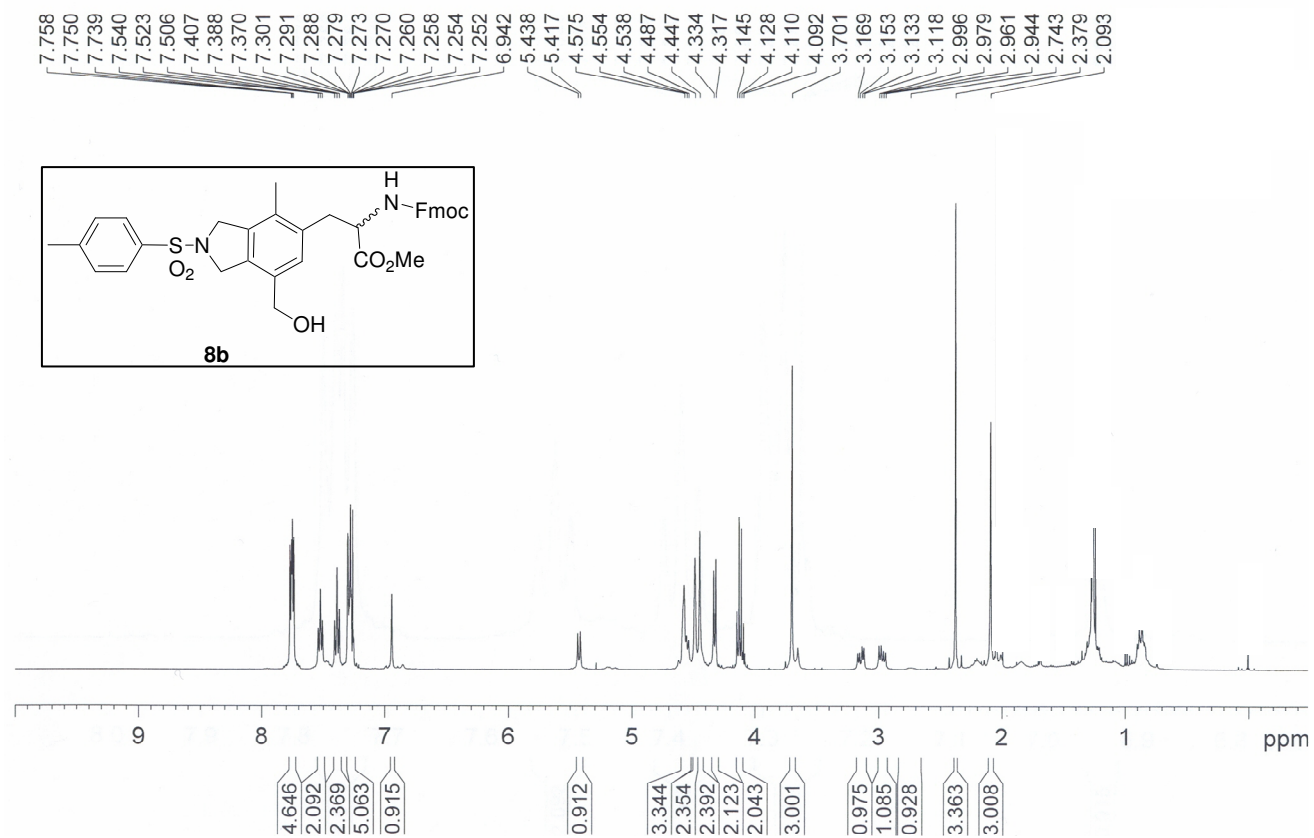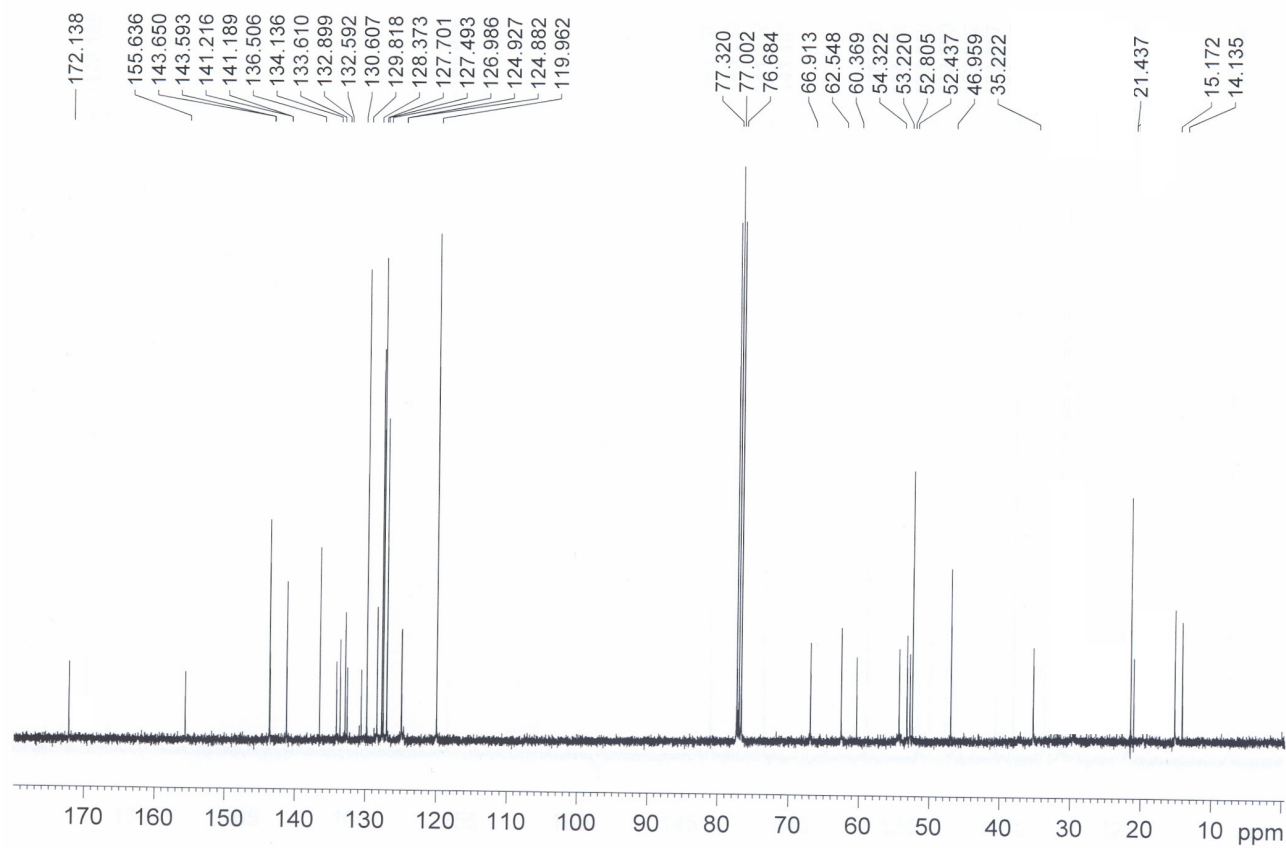

NOESY

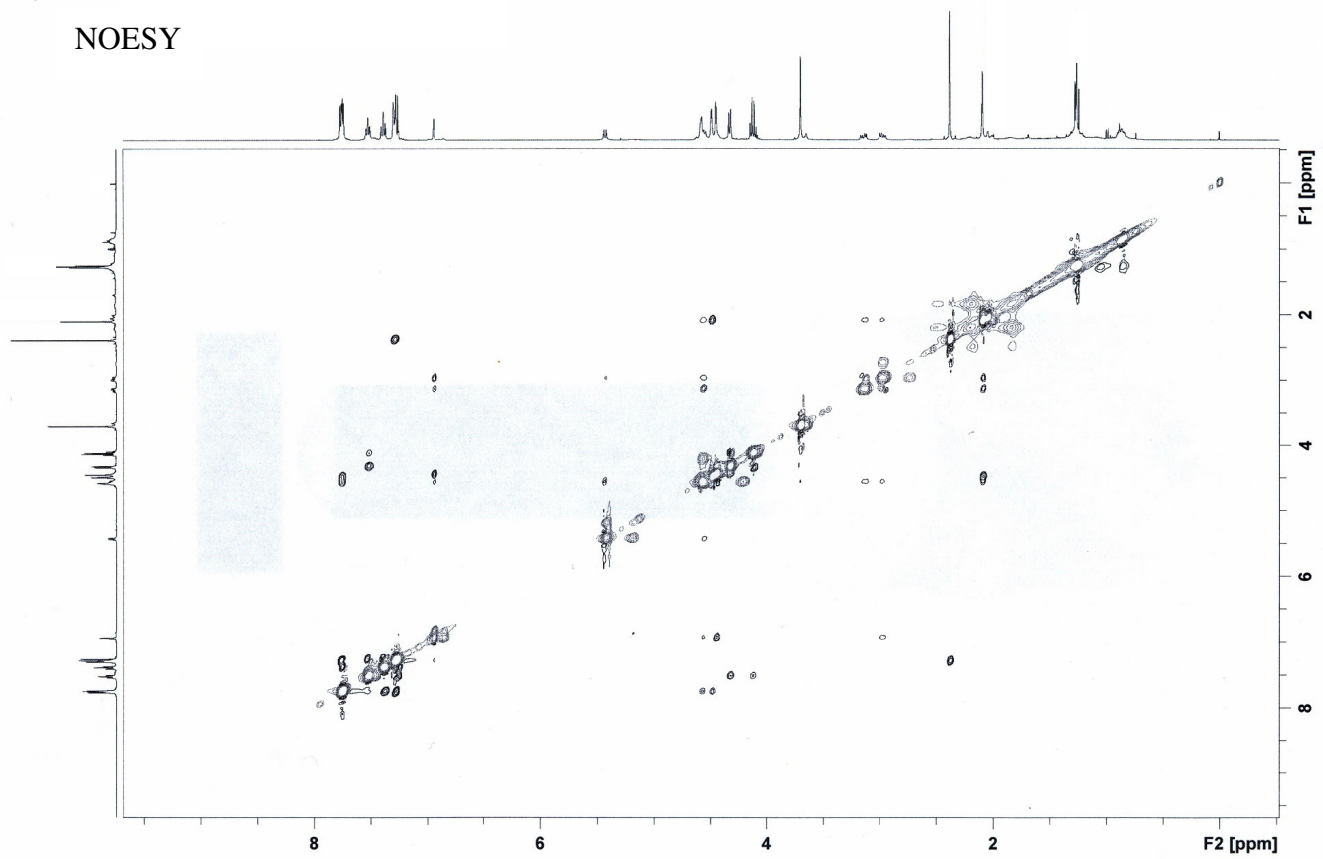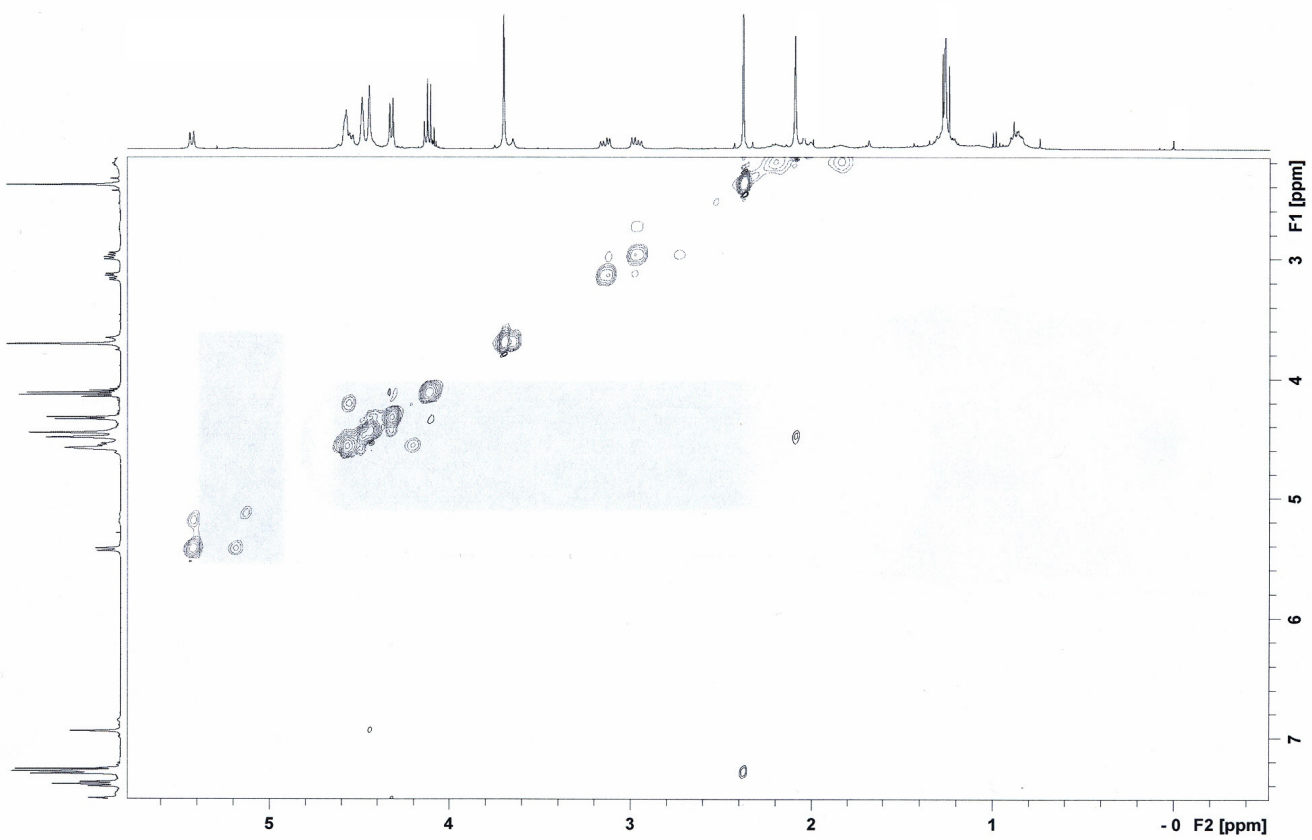



NOESY

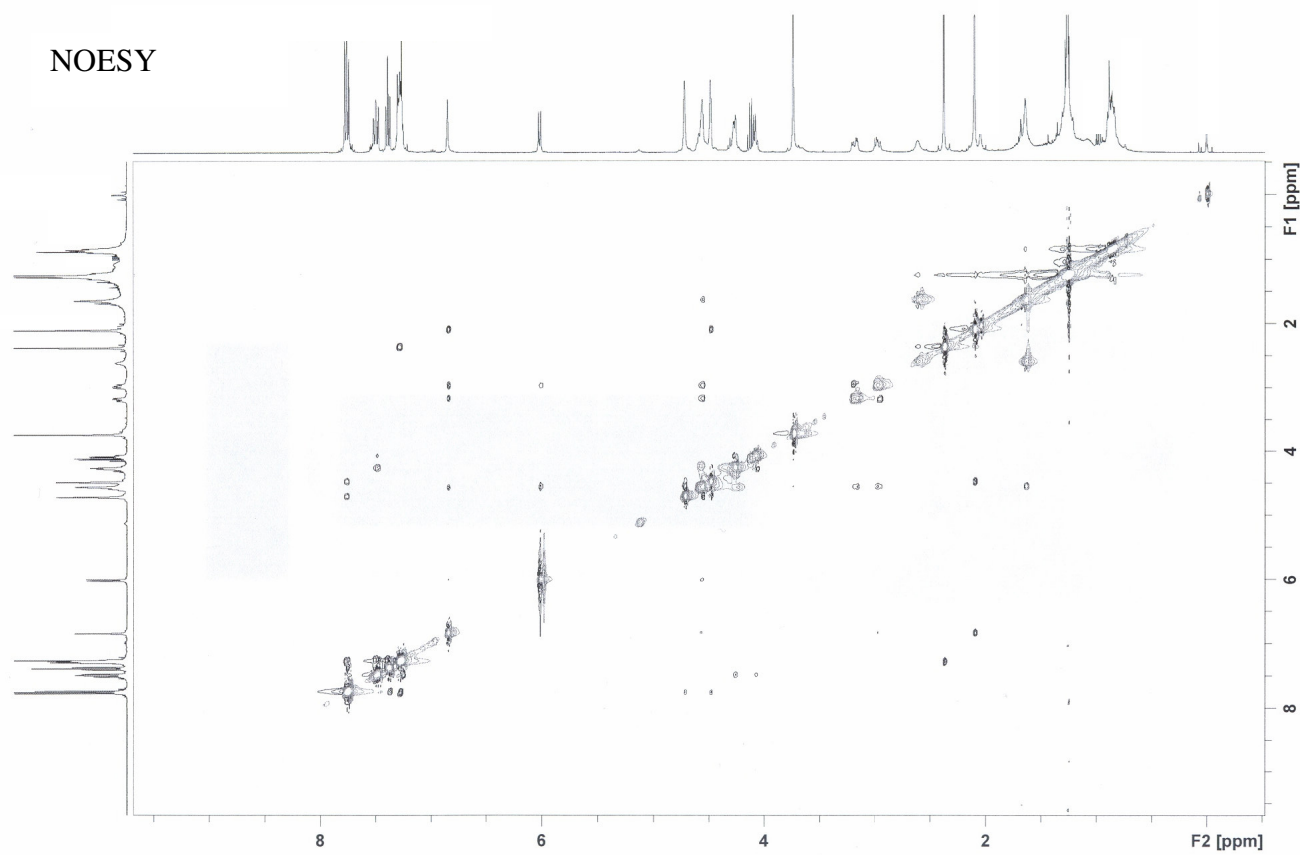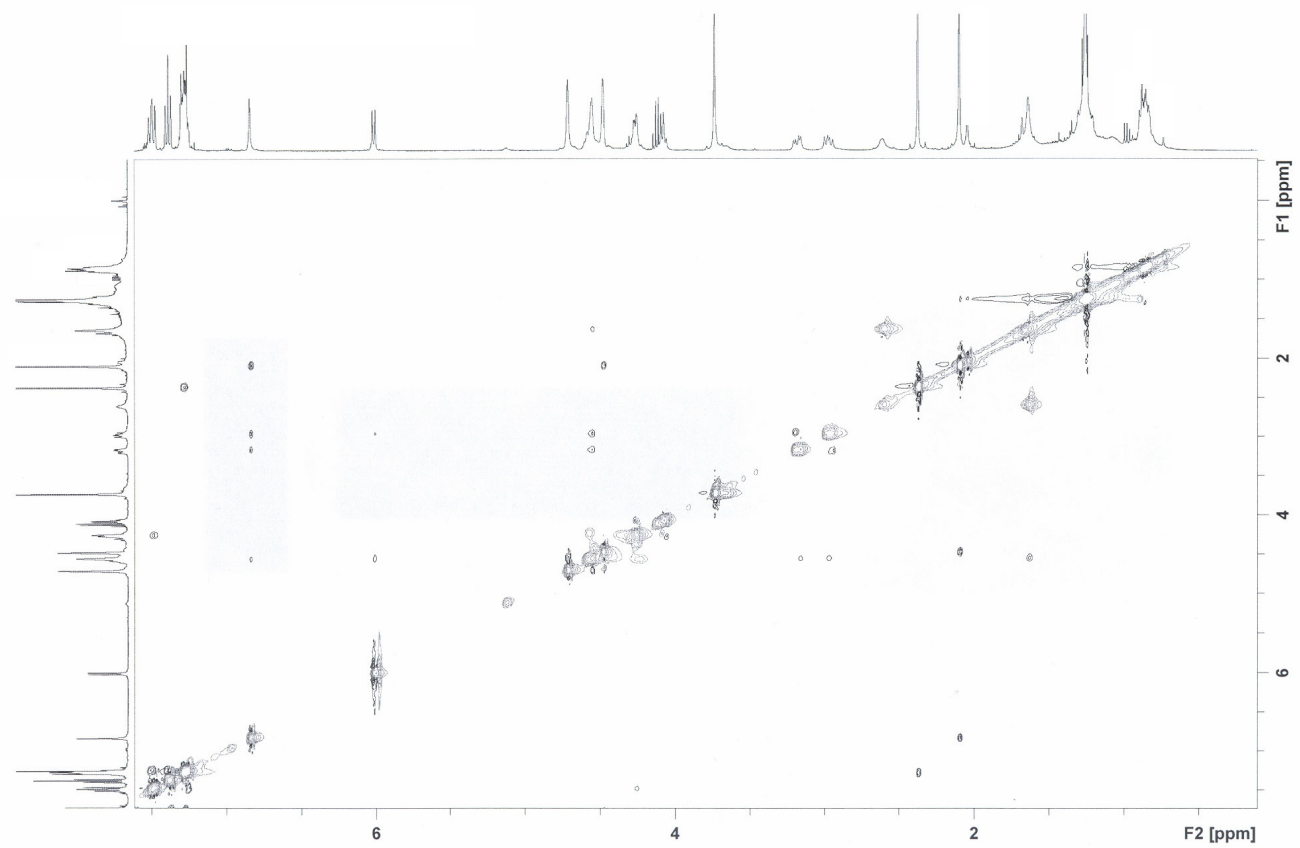

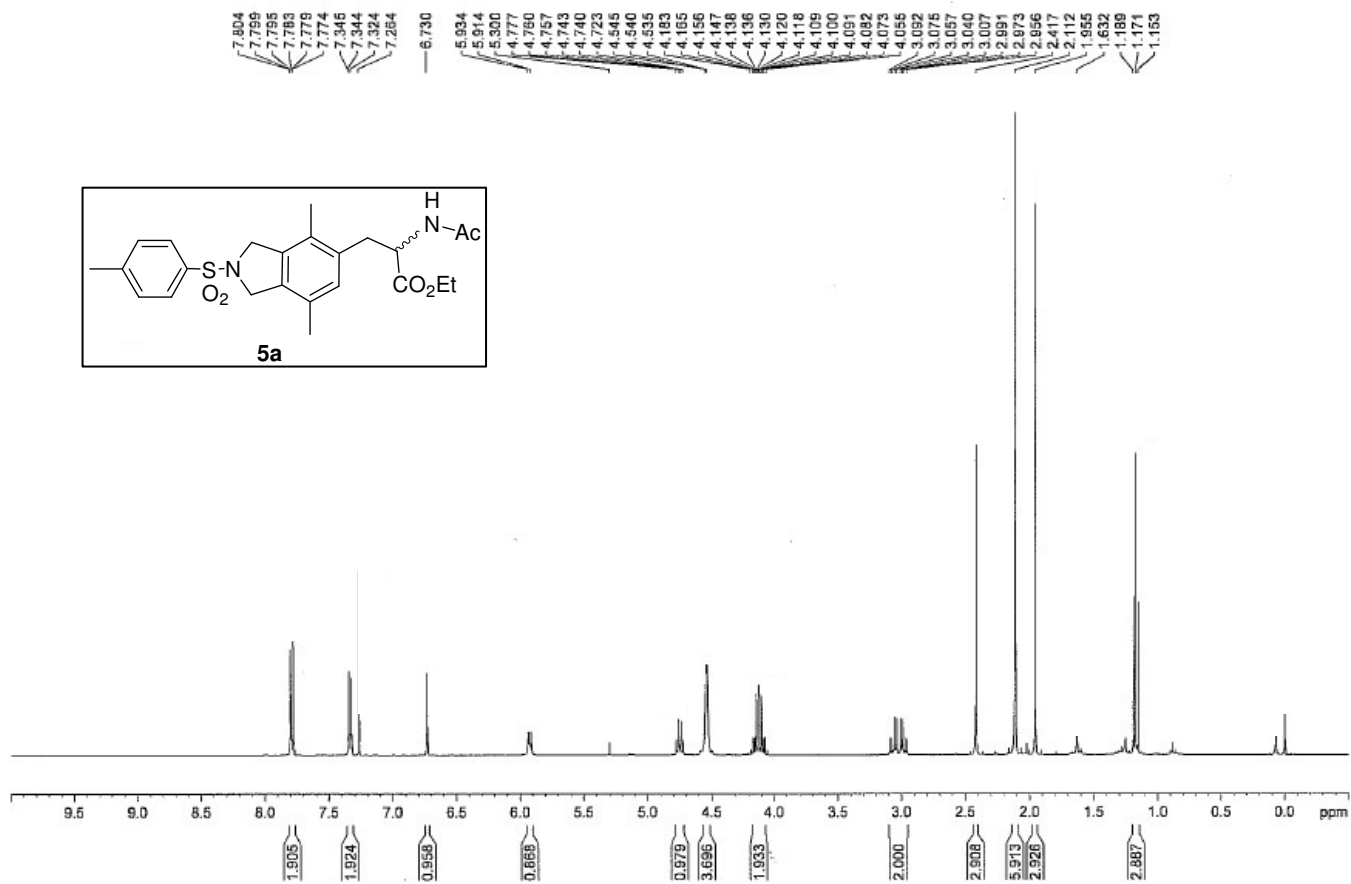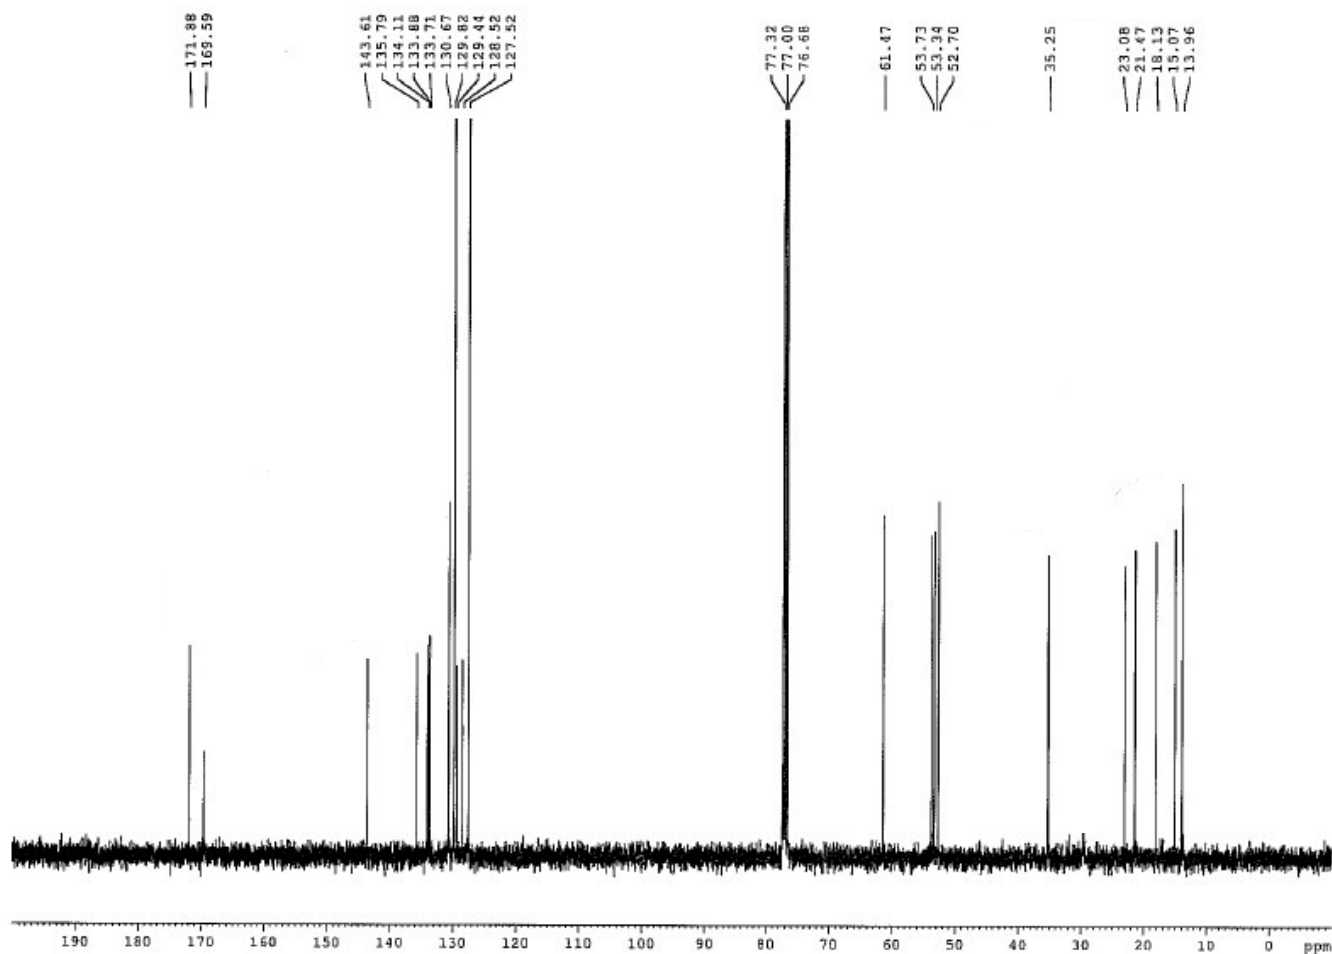

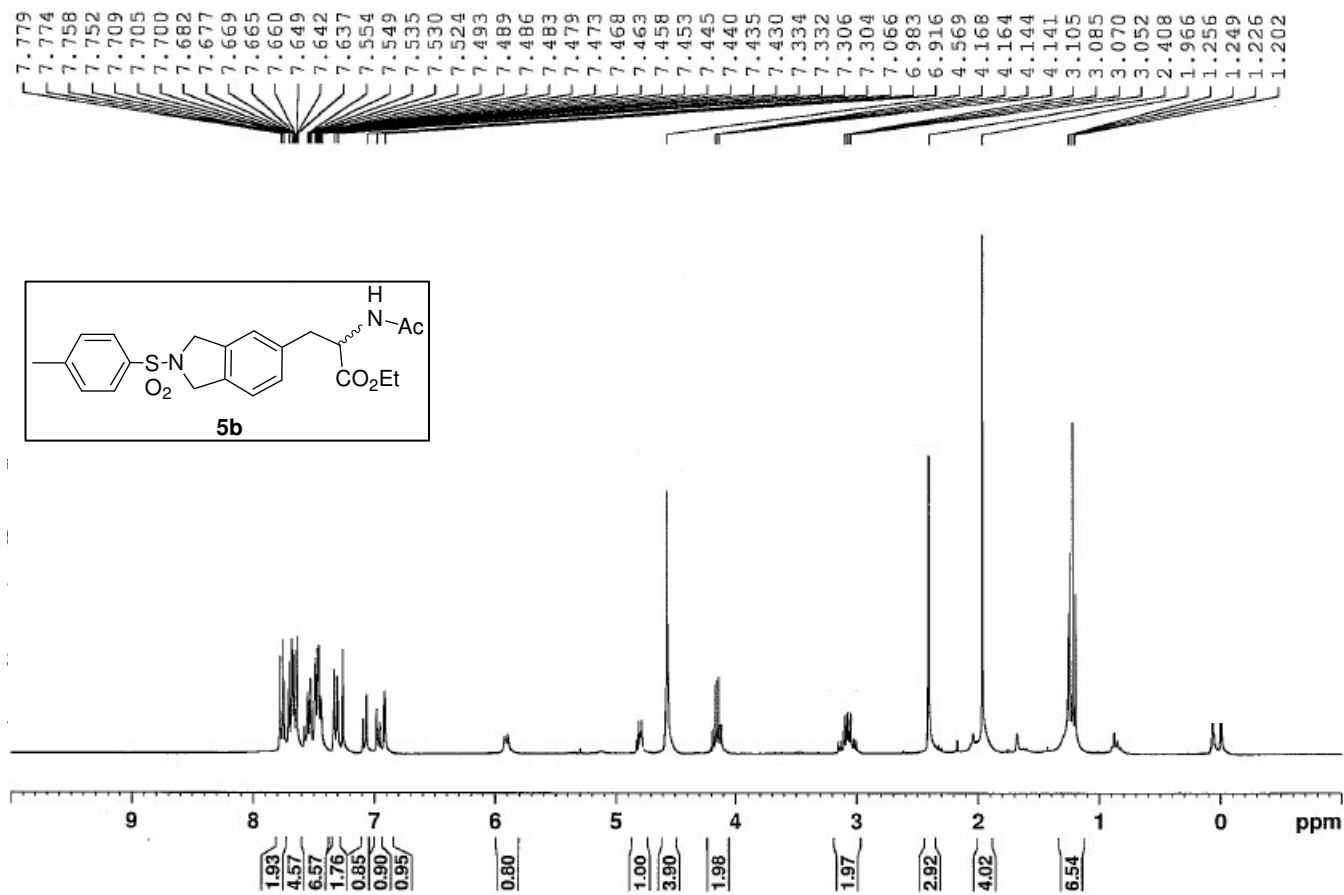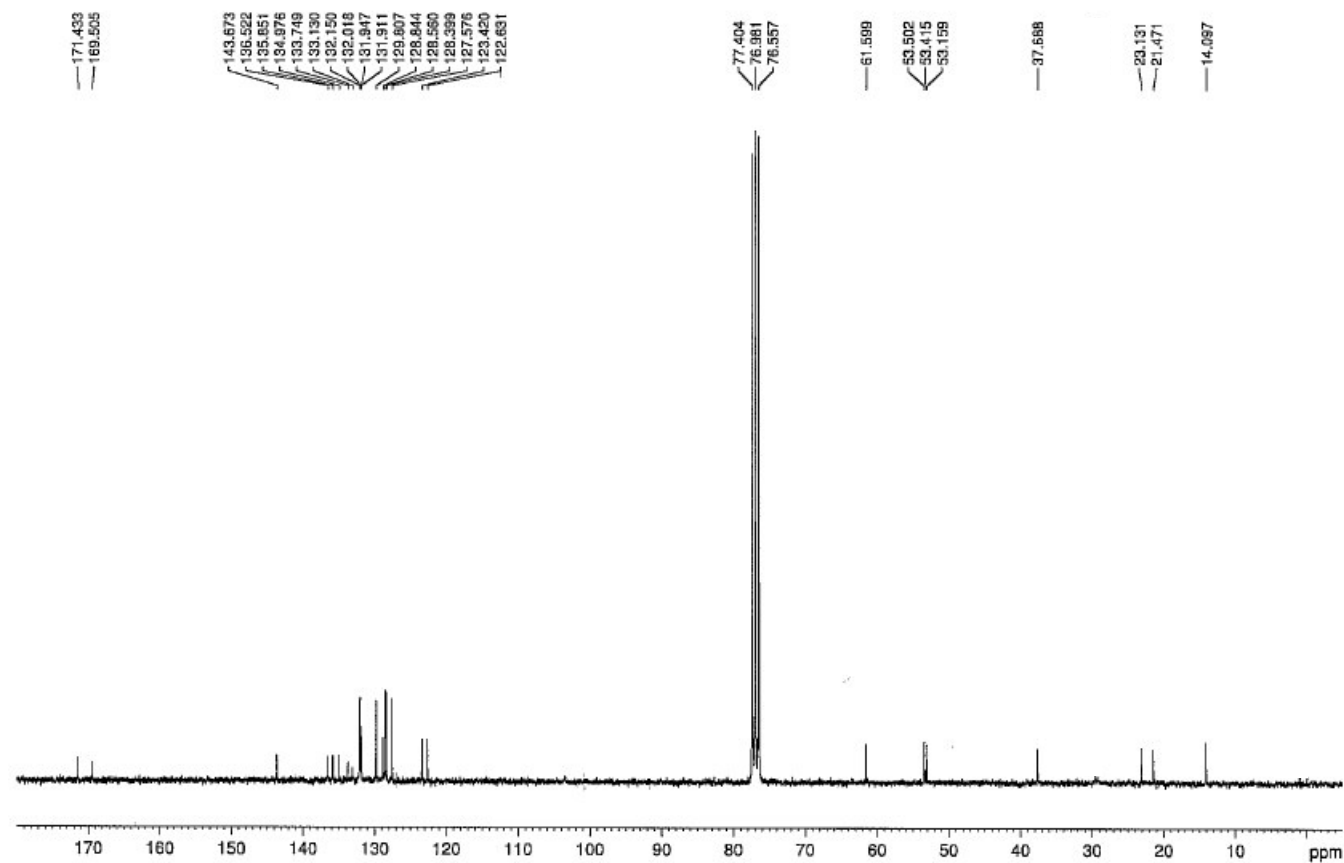

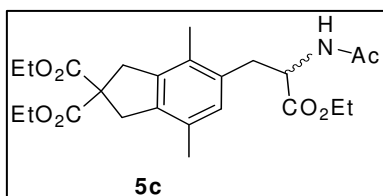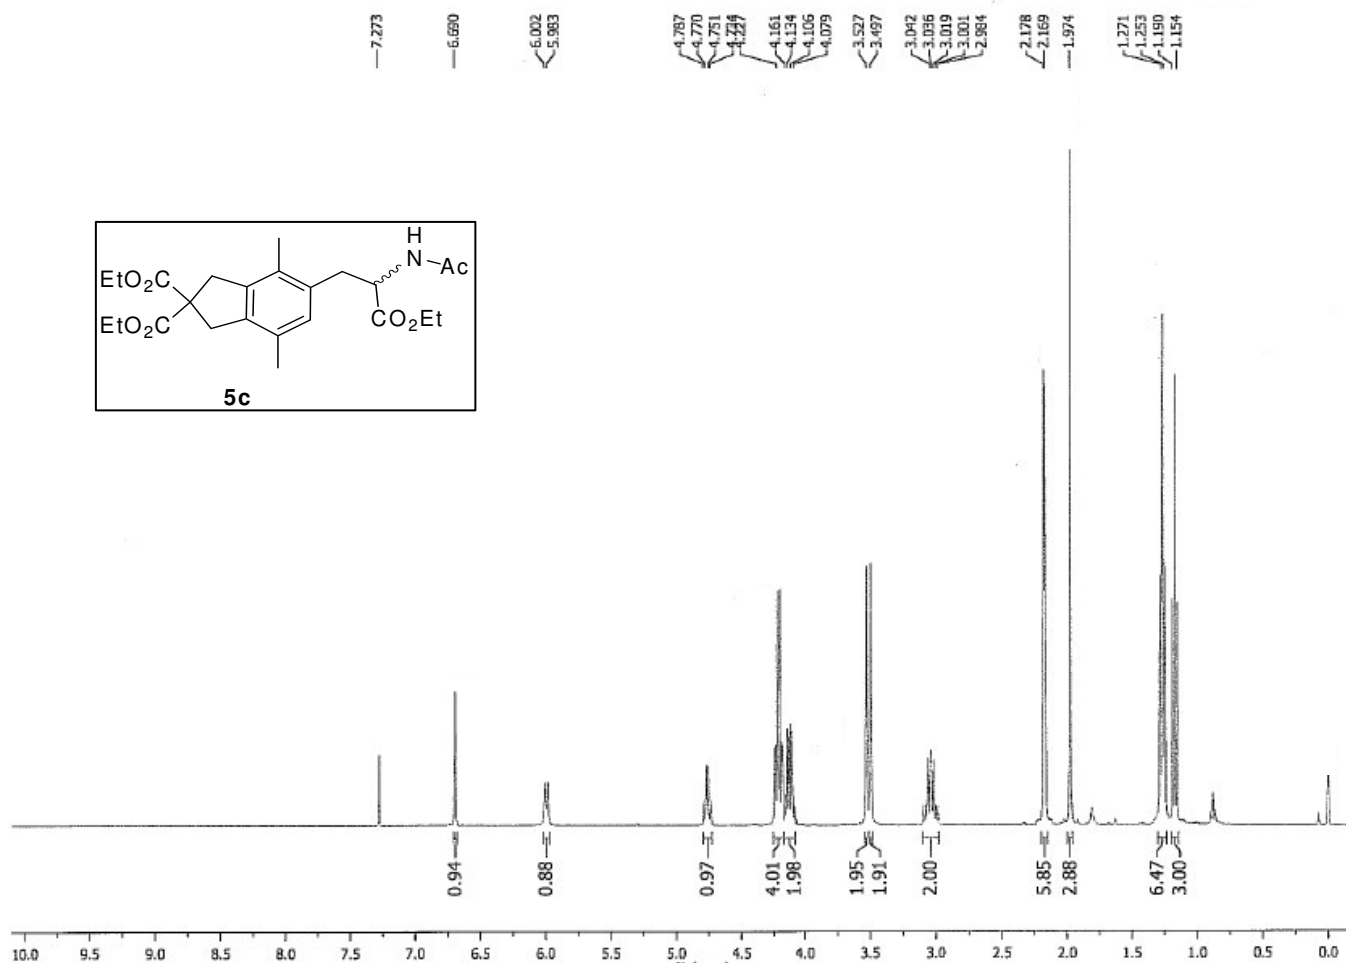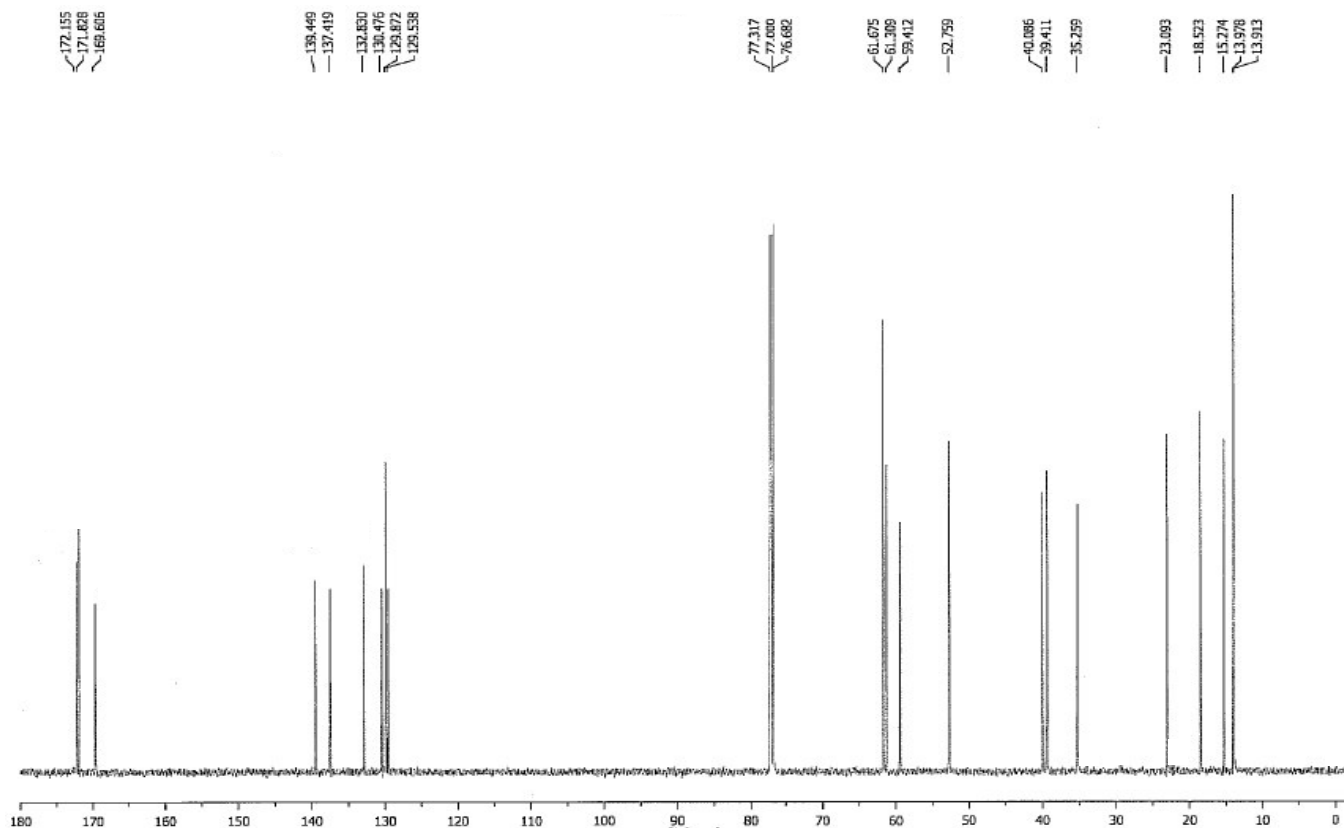

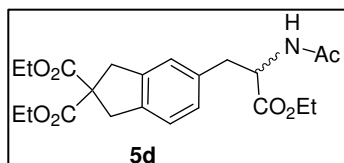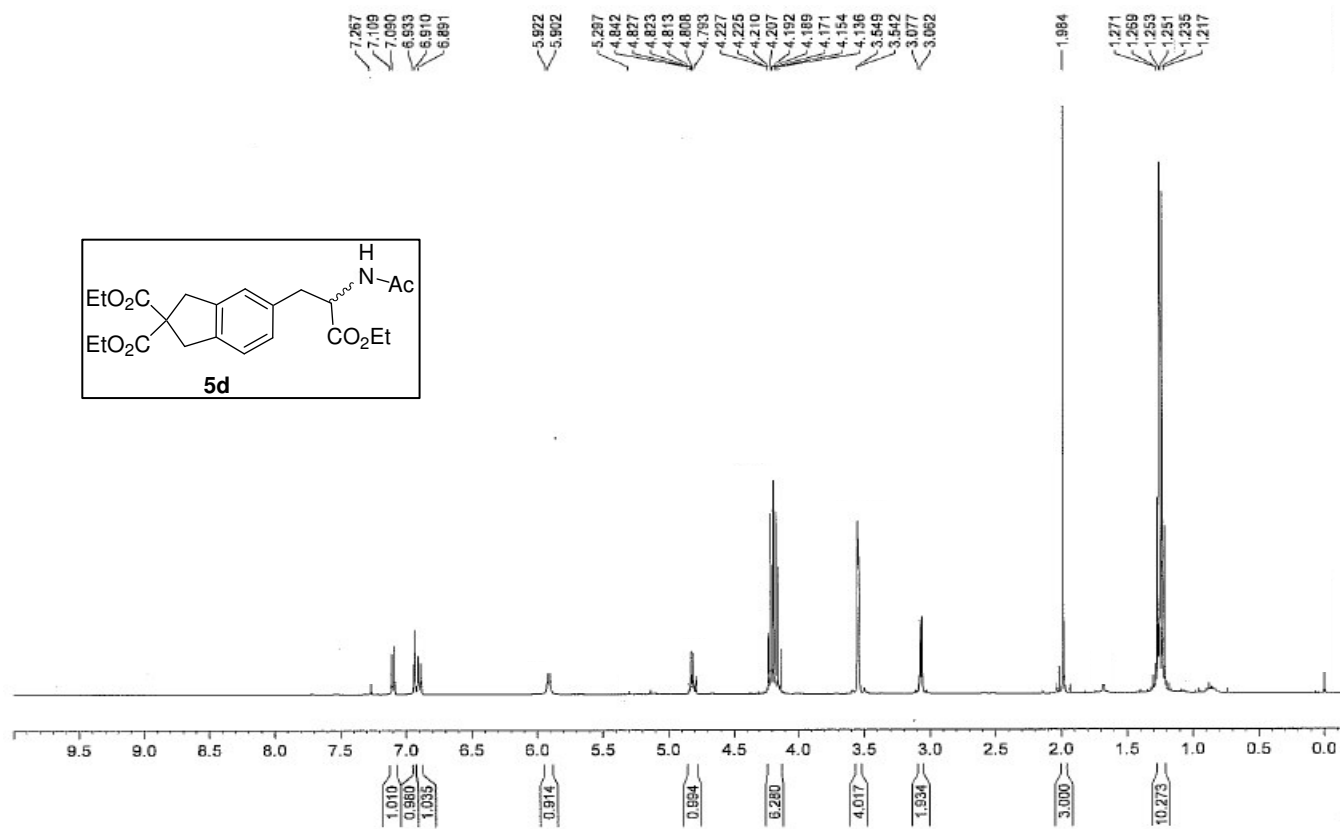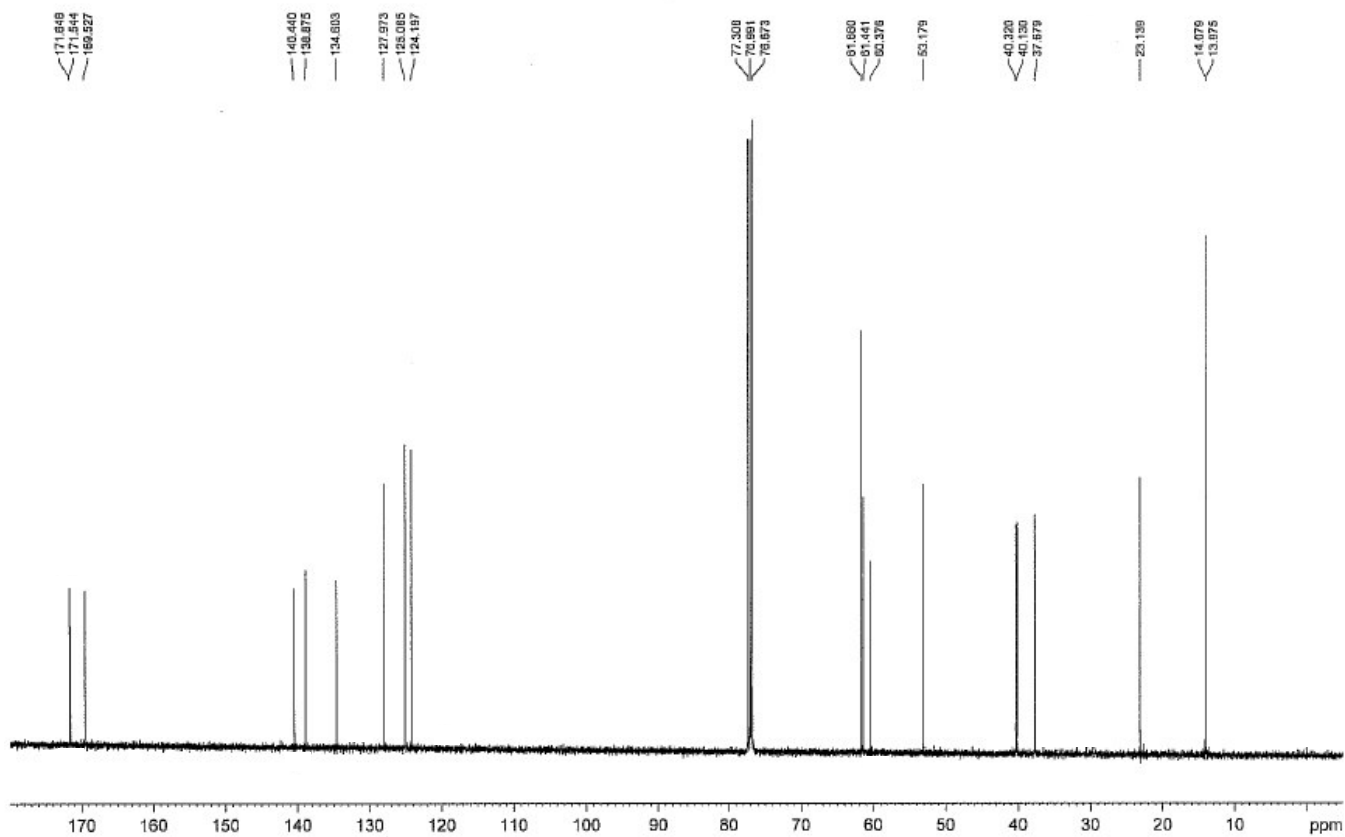



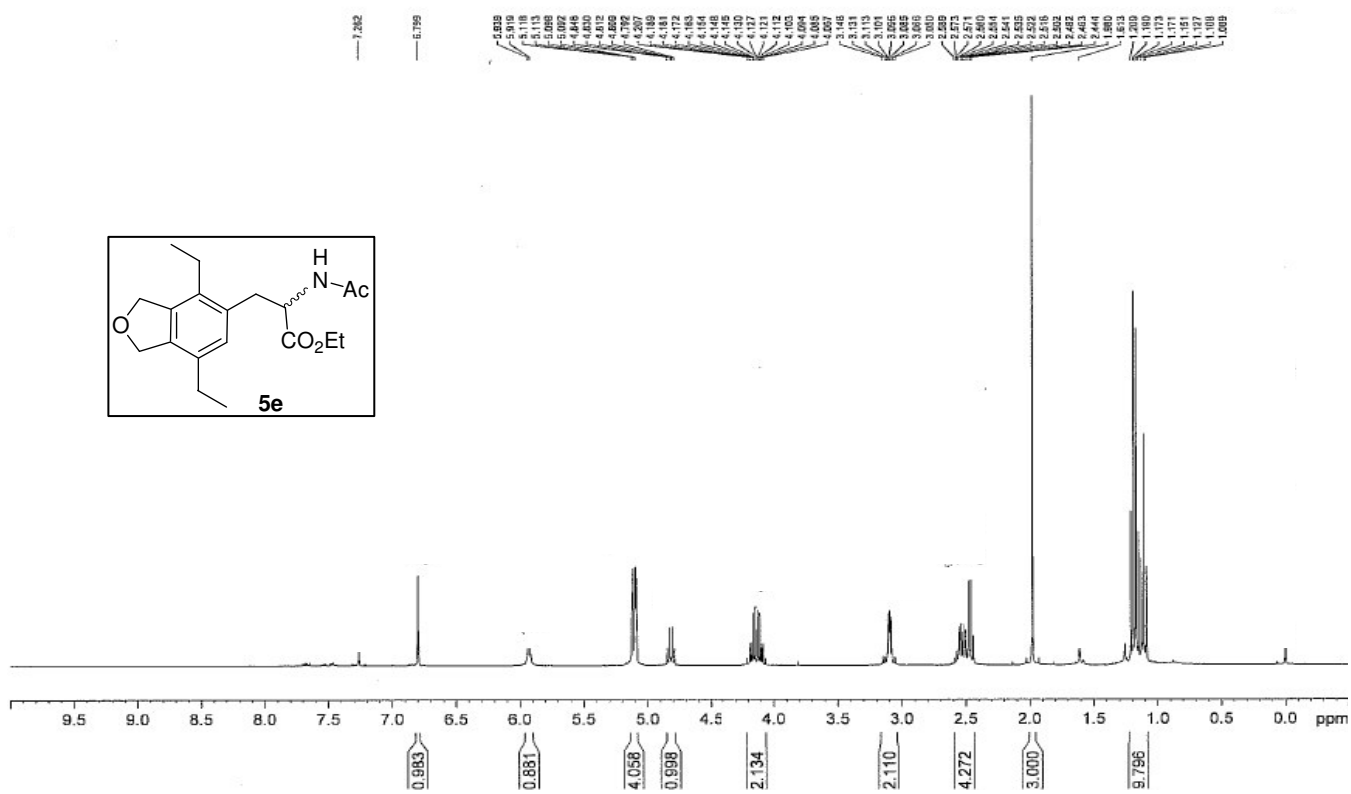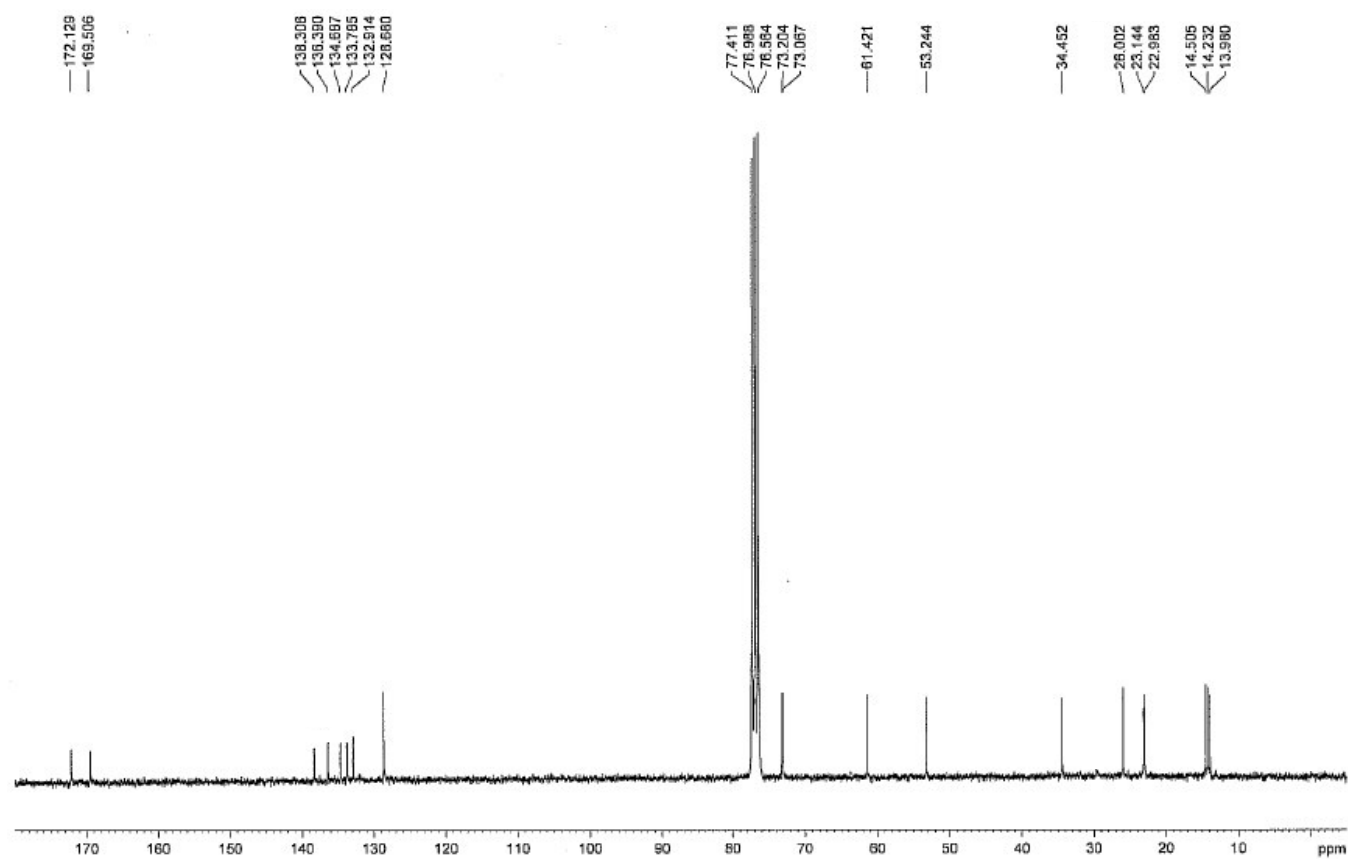

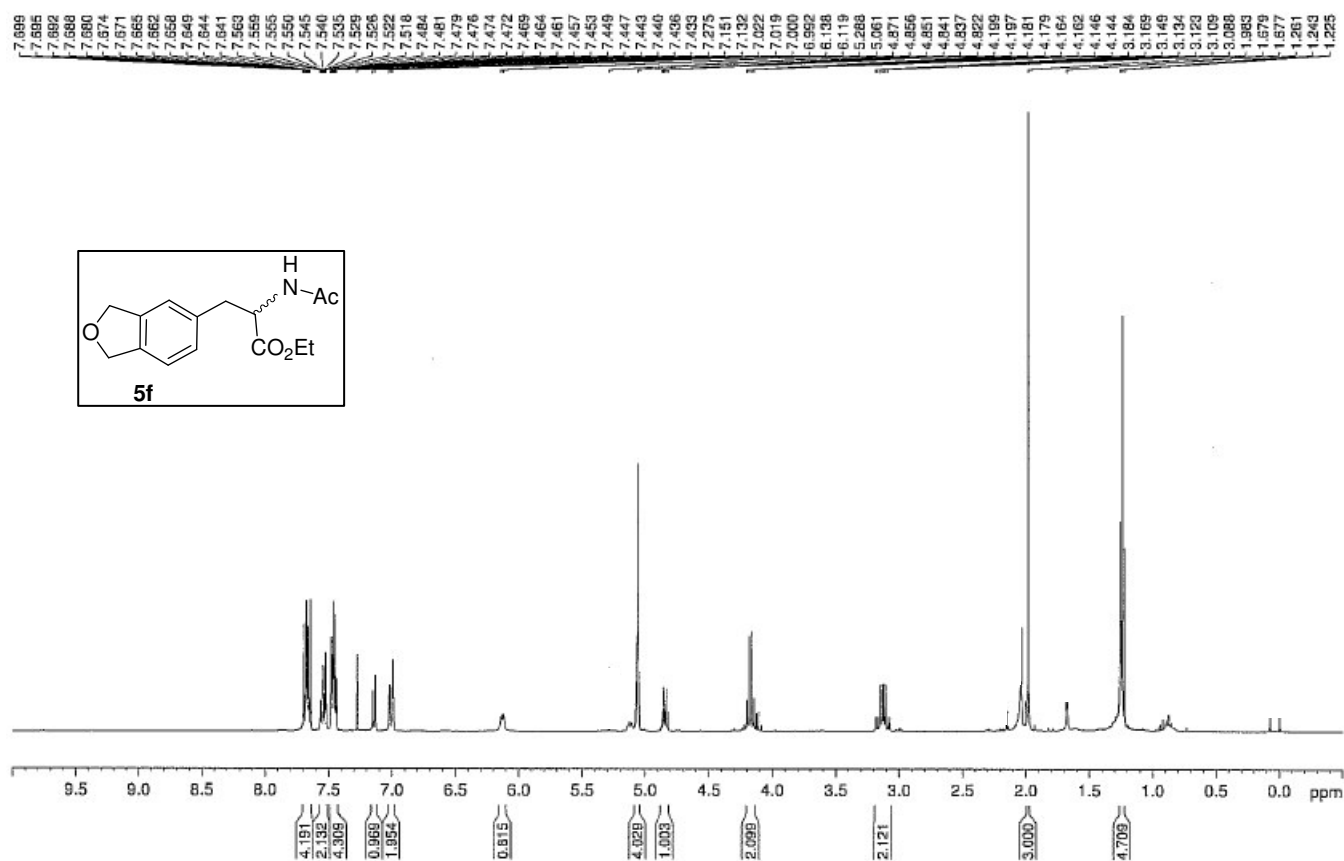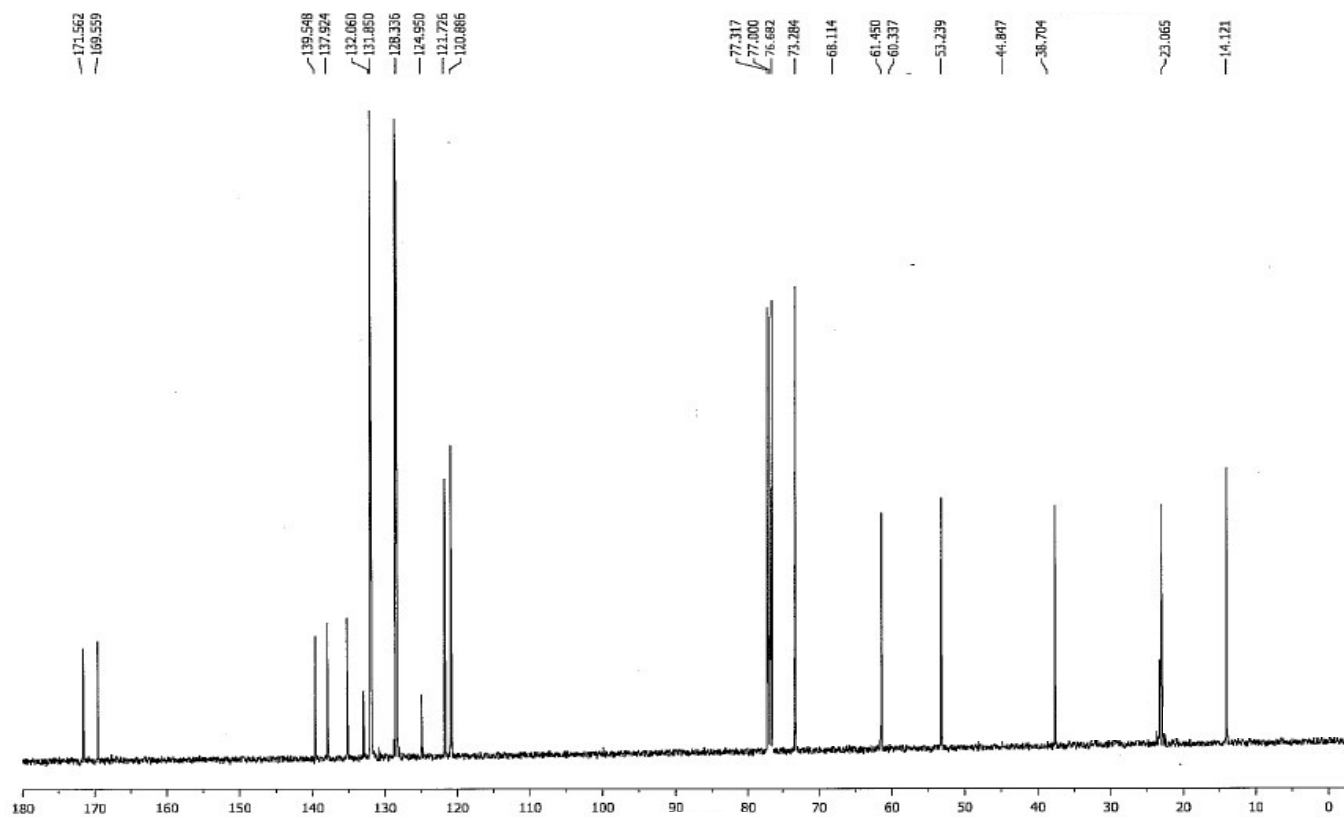

# $^1\text{H}$ and $^{13}\text{C}$ NMR spectra of homocoupled product 6

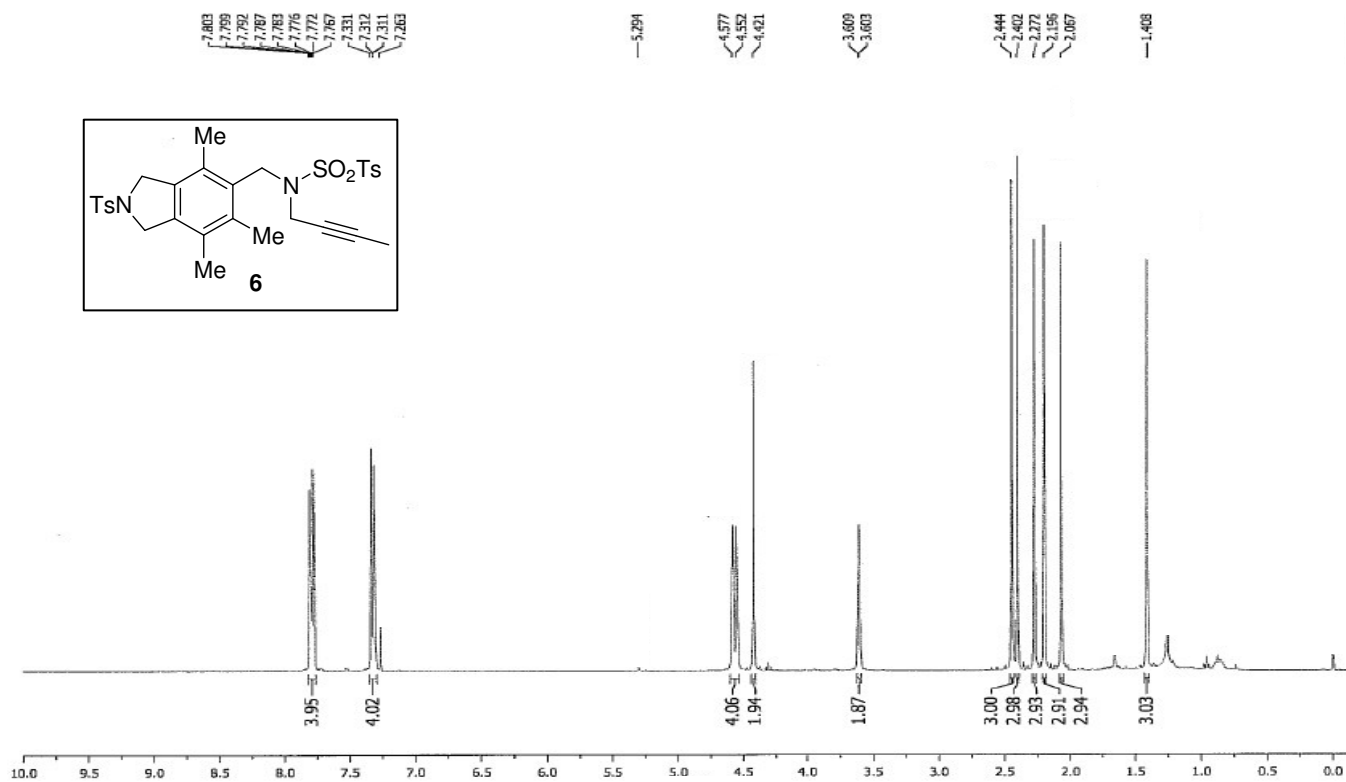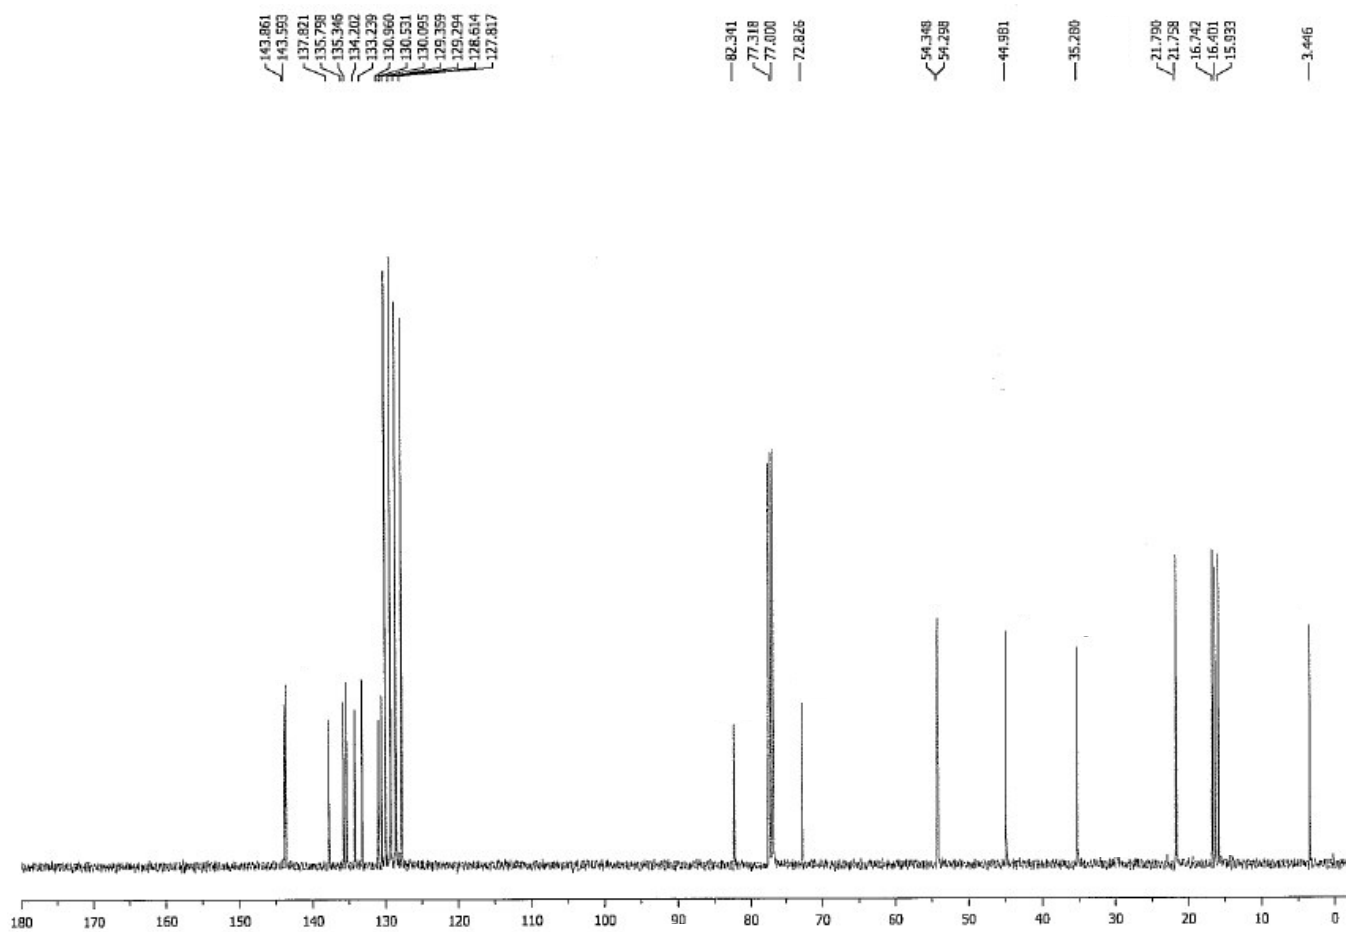

Supplement: b910961g.pdf [file b910961g.pdf]
